# Supplementary material for: Ligand pre-inserted α-diimine palladium catalysts and mechanism studies in olefin polymerization
Source: Royal Society of Chemistry journal article supplement (doi:10.1039/d3py01011b), 2023-11-30
Supplement: d3py01011b1.pdf [file d3py01011b1.pdf]

## *Supporting information for*

### **Ligand Pre-inserted $\alpha$ -Diimine Palladium Catalysts and Mechanism Studies in Olefin Polymerization**

Yue Liu,<sup>‡</sup><sup>a</sup> Gang Yang,<sup>‡</sup><sup>a</sup> Chao Li,<sup>\*a</sup> Chen Tan<sup>\*a</sup> and Min Chen<sup>\*a</sup>

Institutes of Physical Science and Information Technology, Key Laboratory of Structure and Functional Regulation of Hybrid Materials of Ministry of Education, Anhui University, Hefei, Anhui 230601, China.

#### **Table of Contents**

|                                                                                                |           |
|------------------------------------------------------------------------------------------------|-----------|
| <b>1. Experimental section .....</b>                                                           | <b>1</b>  |
| <b>1.1. General Methods.....</b>                                                               | <b>1</b>  |
| <b>1.2. Computational Methods.....</b>                                                         | <b>2</b>  |
| <b>2. Mechanism investigation.....</b>                                                         | <b>7</b>  |
| <b>3. <sup>1</sup>H NMR, <sup>13</sup>C NMR and MALDI-TOF-MS of ligands and catalysts.....</b> | <b>9</b>  |
| <b>4. <sup>1</sup>H NMR of the Polymers.....</b>                                               | <b>18</b> |
| <b>5. GPC traces of polymers.....</b>                                                          | <b>26</b> |
| <b>6. X-ray crystallography .....</b>                                                          | <b>35</b> |

## 1. Experimental section

**1.1. General Methods.** All experiments were carried out under dry Nitrogen atmosphere using standard Schlenk techniques or in a glove-box. Deuterated solvents used for NMR were dried and distilled prior to use.  $^1\text{H}$  and  $^{13}\text{C}$  spectra were recorded a Bruker AscendTm 400 spectrometer at ambient temperature unless otherwise stated. The chemical shifts of the  $^1\text{H}$  and  $^{13}\text{C}$  NMR spectra were referenced to tetramethylsilane. Molecular weights and molecular weight distributions were determined by gel permeation chromatography (GPC, Waters) at  $40^\circ\text{C}$  with THF as the eluent, and the calibration was made using polystyrene standard. Dichloromethane, THF, toluene and hexane were purified by solvent purification systems.

**1.2. Computational Methods.** All the DFT studies were performed by using the Gaussian 16 program. For geometry optimizations, the B3LYP hybrid exchange-correlation functional and the dispersion-corrected density functional theory (B3LYP-D3BJ) were used. The 6-31G(d) basis set was used for H, C, Cl and N atoms. Pd atoms were treated by the LANL2DZ basis set. In the single point energy calculations, the dispersion-corrected density functional theory B3LYP-D3(BJ) and a larger basis set BSII were used. In the BSII, 6-311+G(d,p) was used for H, C, Cl and N atoms, and Pd atoms were treated by the SDD basis set. In these single-point calculations, solvation effects were considered with the SMD model. The toluene was employed as a solvent in the SMD solvation calculations. Normal modes of all structures were examined. No imaginary frequency was observed except for the transition states.

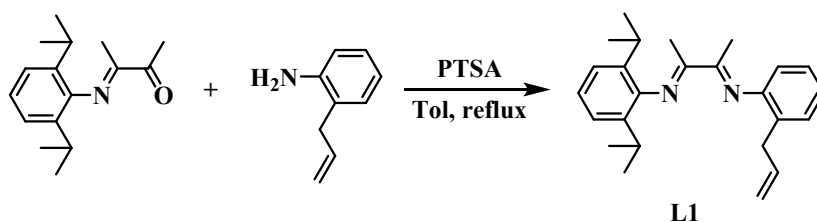

**Preparation of L1.** To a 250 mL round-bottomed flask equipped with a cold-water condenser was charged (E)-3-((2,6-diisopropylphenyl)imino)butan-2-one (2.45 g, 10 mmol), 2-allylaniline (1.33 g, 10 mmol), PTSA (5% mmol, 95 mg) and toluene (100 mL). The stirred solution was warmed to  $140^\circ\text{C}$  and held for 24 h while the toluene distilled. After removing toluene, the remaining volatiles were removed under vacuum. Afterwards, the crude product was purified by column chromatography using a gradual mixture of petroleum ether and ethyl

acetate to achieve the light yellow solid **L1** (3.2 g, 89%).  $^1\text{H}$  NMR (400 MHz,  $\text{CDCl}_3$ )  $\delta$  7.18-7.13 (m, 2H), 7.08 (d,  $J = 7.6$  Hz, 2H), 7.04-6.97 (m, 2H), 6.75-6.59 (m, 1H), 5.91-5.71 (m, 1H), 5.05-4.86 (m, 2H), 3.20 (m, 2H), 2.60&2.49-2.44 (m, 2H), 2.50&2.07 (s, 3H), 1.95 & 1.74 (s, 3H), 1.13-1.02 (m, 12H).  $^{13}\text{C}$  NMR (101 MHz,  $\text{CDCl}_3$ )  $\delta$  199.11 (s), 167.08 (s), 166.65 (s), 148.13 (s), 145.11 (s), 135.86 (s), 133.92 (s), 128.75 (s), 128.10 (s), 125.86 (s), 123.12 (s), 122.71 (s), 121.92 (s), 117.10 (s), 114.23 (s), 76.31 (s), 75.99 (s), 75.67 (s), 35.57 (s), 27.27 (s), 22.08 (s), 21.77 (s), 15.36 (s), 14.80 (s).

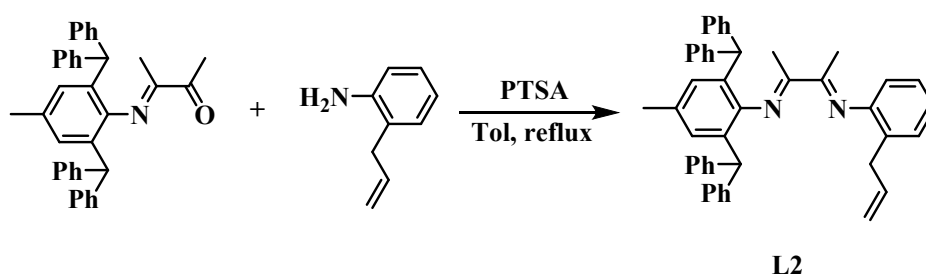

**Preparation of L2.** To a 250 mL round-bottomed flask equipped with a cold-water condenser was charged (E)-3-((2,6-dibenzhydryl-4-methylphenyl)imino)butan-2-one (5.0 g, 10 mmol), 2-allylaniline (1.33 g, 10 mmol), PTSA (5% mmol, 95 mg) and toluene (100 mL). The stirred solution was warmed to 140°C and held for 24 h while the toluene distilled. After removing toluene, the remaining volatiles were removed under vacuum. Afterwards, the crude product was purified by column chromatography using a gradual mixture of petroleum ether and ethyl acetate to achieve the light yellow solid **L2** (5.3 g, 85%).  $^1\text{H}$  NMR (400 MHz,  $\text{CDCl}_3$ )  $\delta$  7.17-7.07 (m, 12H), 7.04-6.91 (m, 12H), 6.57 (s, 2H), 5.95-5.88 (m, 1H), 5.08 (d,  $J = 11.0$  Hz, 2H), 5.02 (s, 2H), 3.40 (d,  $J = 5.7$  Hz, 2H), 2.25 (s, 3H), 2.08 (s, 3H), 0.58 (s, 3H).  $^{13}\text{C}$  NMR (101 MHz,  $\text{CDCl}_3$ )  $\delta$  170.20 (s), 167.28 (s), 149.06 (s), 145.73 (s), 143.57 (s), 142.50 (s), 136.69 (s), 132.04 (s), 131.78 (s), 131.46 (s), 131.01 (s), 129.77 (s), 129.64 (s), 129.56 (s), 129.45 (s), 129.39 (s), 129.92 (s), 128.77 (s), 128.69 (s), 128.56 (s), 128.46 (s), 128.18 (s), 128.11 (s), 127.72 (s), 127.03 (s), 126.85 (s), 126.49 (s), 124.39 (s), 126.25 (s), 126.11 (s), 124.06 (s), 117.78 (s), 115.79 (s), 77.38 (s), 77.06 (s), 76.75 (s), 52.32 (s), 35.86 (s), 21.36 (s), 21.28 (s), 15.95 (s), 15.85 (s).

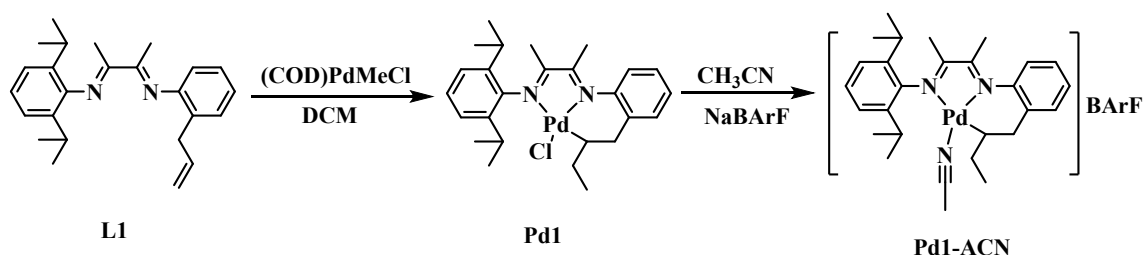

**Preparation of Pd1.** In nitrogen atmosphere, ligand **L1** (0.72 g, 2 mmol) was dissolved in DCM, and metal precursor (COD)PdMeCl (0.53 g, 2 mmol) was added, stirring for 12 h. Concentrated to remove the solvent and adding a little of acetone precipitate to obtain brick red solid **Pd1** (0.79 g, 77%). <sup>1</sup>H NMR (400 MHz, CDCl<sub>3</sub>) δ 7.39 (m, 1H), 7.30 (m, 2H), 7.22-7.16 (m, 3H), 7.07 (m, 1H), 3.54-3.48 (m, 1H), 3.16 (m, 1H), 2.94-2.84 (m, 2H), 2.50 (s, 3H), 2.03 (s, 3H), 1.93 (m, 1H), 1.42 (d, *J* = 6.7 Hz, 3H), 1.38 (d, *J* = 5.9 Hz, 1H), 1.34 (d, *J* = 6.8 Hz, 3H), 1.18 (d, *J* = 6.9 Hz, 3H), 1.08 (d, *J* = 6.9 Hz, 3H), 0.81 (t, *J* = 7.2 Hz, 3H), 0.71-0.62 (m, 1H). <sup>13</sup>C NMR (101 MHz, CDCl<sub>3</sub>) δ 169.63 (s), 168.29 (s), 141.80 (s), 141.44 (s), 140.67(s), 138.32 (s), 137.41 (s), 132.18 (s), 128.75 (s), 126.77 (s), 126.22 (s), 123.40 (s), 123.21(s), 77.34 (s), 77.02 (s), 76.70 (s), 47.62 (s), 36.98 (s), 28.61 (s), 27.10 (s), 24.49 (s), 23.67 (s), 23.45 (s), 22.52 (s), 19.79 (s), 12.53 (s). MALDI-TOF-MS (*m/z*) for C<sub>26</sub>H<sub>35</sub>N<sub>2</sub>Pd: 481.1950 [M-Cl]. Anal. Calcd for C<sub>26</sub>H<sub>35</sub>ClN<sub>2</sub>Pd: C, 60.35; H, 6.82; N, 5.41; Found: C, 60.31; H, 6.89; N, 5.48.

**Preparation of Pd1-ACN.** **Pd1** (0.5 g, 1 mmol) and NaBARF (0.93 g, 1.05 mmol) were added into a 20 ml sample bottle, mixed with 10 ml DCM and 5 ml CH<sub>3</sub>CN solvent, stirred for 12 h, filtered, drained, washed off the residual acetonitrile, and collected red solid to obtain **Pd1-ACN** (0.585 g, 98%). <sup>1</sup>H NMR (400 MHz, CDCl<sub>3</sub>) δ 7.61 (s, 8H), 7.43 (s, 4H), 7.27-7.13 (m, 6H), 6.93 (d, *J* = 7.6 Hz, 1H), 3.23-3.12 (m, 1H), 2.91 (d, *J* = 15.5 Hz, 1H), 2.73-2.61 (m, 2H), 2.51 (s, 3H), 2.06 (s, 3H), 1.77 (d, *J* = 14.8 Hz, 1H), 1.59 (s, 3H), 1.19-1.13 (m, 6H), 1.09 (d, *J* = 6.9 Hz, 3H), 1.01 (d, *J* = 6.9 Hz, 3H), 0.87-0.80 (m, 1H), 0.72 (t, *J* = 7.1 Hz, 3H), 0.53-0.41 (m, 1H). <sup>13</sup>C NMR (101 MHz, CDCl<sub>3</sub>) δ 172.40 (s), 172.16 (s), 162.63 (s), 162.13 (s), 161.64 (s), 161.14 (s), 140.26 (s), 140.22(s), 139.14 (s), 138.53 (s), 137.29 (s), 135.01 (s), 132.57 (s), 130.75 (s), 129.26 (s), 128.95 (s), 128.13 (s), 127.46 (s), 126.11 (s), 124.35 (s), 123.40 (s), 120.88 (s), 120.69(s), 117.69 (s), 77.55 (s), 77.23 (s), 76.91 (s), 53.68 (s), 37.36

(s), 29.04 (s), 28.67 (s), 24.26 (s), 23.73 (s), 23.35 (s), 22.77 (s), 20.12 (s), 13.11 (s), 1.71 (s). MALDI-TOF-MS (m/z) for  $C_{26}H_{35}N_2Pd$ : 481.1424 [M-Anion-CH<sub>3</sub>CN]. Anal. Calcd for  $C_{26}H_{35}ClN_2Pd$ : C, 51.99; H, 3.64; N, 3.03; Found: C, 60.01; H, 3.59; N, 3.09.

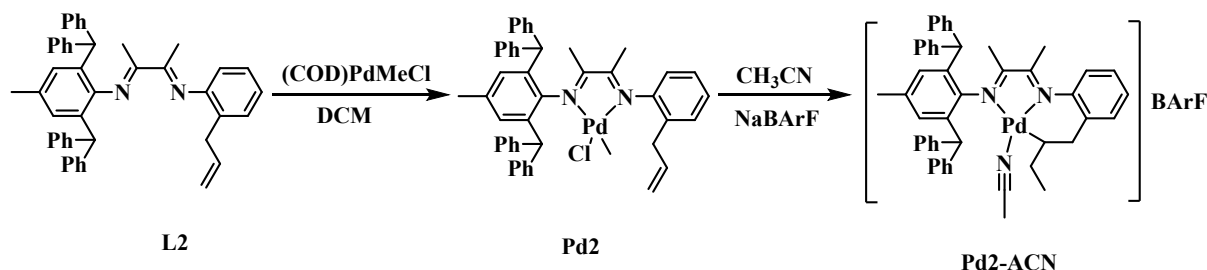

**Preparation of Pd2.** In nitrogen atmosphere, ligand **L2** (1.24 g, 2 mmol) was dissolved in DCM, and metal precursor (COD)PdMeCl (0.53 g, 2 mmol) was added, stirring for 12 h. Concentrated to remove the solvent and adding a little of acetone precipitate to get brick red solid **Pd2** (1.1 g, 75%). <sup>1</sup>H NMR (400 MHz, CDCl<sub>3</sub>) δ 7.47-7.32 (m, 6H), 7.28 (s, 7H), 7.24-7.05 (m, 10H), 6.90-6.74 (m, 2H), 6.66 (s, 1H), 6.15 (s, 1H), 6.05-5.84 (m, 2H), 5.23-4.96 (m, 2H), 3.85-3.55 (m, 2H), 2.23-2.14 (m, 3H), 1.45-1.38 (s, 3H), 1.03&0.65 (s, 3H), -0.35 (d, *J* = 19.5 Hz, 3H). <sup>13</sup>C NMR (101 MHz, CDCl<sub>3</sub>) δ 179.34 (s), 175.11 (s), 174.02 (s), 169.69 (s), 144.96 (s), 143.1 (s), 142.97 (s), 142.2 (s), 141.97 (s), 141.51 (s), 136.60 (s), 135.46 (s), 134.78 (s), 134.67 (s), 130.43 (s), 129.97 (s), 129.62 (s), 129.56(s), 129.39 (s), 129.3 (s), 129.05 (s), 128.87 (s), 128.8 (s), 128.29 (s), 128.25 (s), 127.70 (s), 127.48 (s), 127.28 (s), 127.14 (s), 127.03 (s), 126.74 (s), 126.38 (s), 121.31 (s), 117.51 (s), 77.55 (s), 77.23 (s), 76.91 (s), 52.53 (s), 52.46 (s), 52.31 (s), 52.18 (s), 36.61 (s), 35.41 (s), 21.69 (s), 19.98 (s), 18.56 (s), 4.74 (s), 3.40 (s). MALDI-TOF-MS (m/z) for  $C_{46}H_{42}ClN_2Pd$ : 763.2634 [M-Me];  $C_{47}H_{45}N_2Pd$ : 743.3975 [M-Cl];  $C_{46}H_{42}N_2Pd$ : 728.2006 [M-Cl-Me]. Anal. Calcd for  $C_{26}H_{35}ClN_2Pd$ : C, 72.40; H, 5.82; N, 3.59; Found: C, 72.41; H, 5.89; N, 3.51.

**Preparation of Pd2-ACN.** **Pd2** (0.78 g, 1 mmol) and NaBArF (0.93 g, 1.05 mmol) were added into a 20 ml sample bottle, mixed with 10 ml DCM and 5 ml CH<sub>3</sub>CN solvent, stirred for 12 h, filtered, drained, washed off the residual acetonitrile, and collected red solid to obtain **Pd2-ACN** (0.83 g, 97%). <sup>1</sup>H NMR (400 MHz, CDCl<sub>3</sub>) δ 7.70 (s, 8H), 7.51 (s, 4H), 7.40-7.35 (m, 4H), 7.34-7.21 (m, 11H), 7.18 (d, *J* = 7.0 Hz, 2H), 7.09 (d, *J* = 7.0 Hz, 2H),

7.03 (d,  $J = 7.1$  Hz, 4H), 6.93 (d,  $J = 5.4$  Hz, 2H), 6.79 (s, 1H), 5.47 (d,  $J = 7.7$  Hz, 2H), 3.31-3.25 (m, 1H), 3.08 (d,  $J = 15.4$  Hz, 1H), 2.22 (s, 3H), 2.18 (s, 3H), 1.91 (d,  $J = 12.9$  Hz, 1H), 1.65 (s, 3H), 1.05-0.97 (m, 1H), 0.85 (t,  $J = 7.2$  Hz, 3H), 0.76 (s, 3H), 0.69-0.60 (m, 1H).  $^{13}\text{C}$  NMR (101 MHz,  $\text{CDCl}_3$ )  $\delta$  172.26 (s), 170.31 (s), 160.39 (s), 159.90 (s), 159.40 (s), 158.90 (s), 139.23 (s), 139.19 (s), 139.07 (s), 138.88 (s), 137.78 (s), 137.10 (s), 134.68 (s), 132.75 (s), 131.58 (s), 130.36 (s), 128.46 (s), 127.44 (s), 127.28 (s), 127.14 (s), 126.99 (s), 126.97 (s), 126.85 (s), 126.77 (s), 126.68 (s), 126.57 (s), 125.42 (s), 125.38 (s), 125.28 (s), 125.23 (s), 123.86 (s), 121.15 (s), 120.52 (s), 118.52 (s), 118.44 (s), 115.43 (s), 75.26 (s), 75.15 (s), 74.95 (s), 74.63 (s), 52.73 (s), 51.28 (s), 50.71 (s), 34.92 (s), 25.63 (s), 19.81 (s), 19.21 (s), 17.03 (s), 10.61 (s). MALDI-TOF-MS ( $m/z$ ) for  $\text{C}_{47}\text{H}_{45}\text{N}_2\text{Pd}$ : 743.2631 [M-Anion- $\text{CH}_3\text{CN}$ ]. Anal. Calcd for  $\text{C}_{81}\text{H}_{60}\text{BF}_{24}\text{N}_3\text{Pd}$ : C, 59.01; H, 3.67; N, 2.55; Found: C, 59.04; H, 3.69; N, 2.51.

**Procedure for Ethylene Polymerization.** In a typical experiment, a 350 mL glass thick-walled pressure vessel was charged with 18 mL toluene and a magnetic stir bar in the glovebox. The pressure vessel was connected to a high-pressure line and the solution was degassed. The vessel was warmed to desired temperature using an oil bath and allowed to equilibrate for 15 minutes. 10  $\mu\text{mol}$  of Pd catalyst in 2 mL  $\text{CH}_2\text{Cl}_2$  was injected into the polymerization system via syringe. With rapid stirring, the reactor was pressurized and maintained at 8.0 atm of ethylene. After a desired amount of time, the polymerization was quenched with methanol. The polyethylene was collected and dried at 45°C in vacuum.

**Procedure for Ethylene-Polar Monomer Copolymerization.** In a typical experiment, a 350 mL glass thick-walled pressure vessel was charged with toluene and polar monomer in total 18 mL, a magnetic stir bar in the glovebox. The pressure vessel was connected to a high-pressure line and the solution was degassed. The vessel was warmed to desired temperature using an oil bath and allowed to equilibrate for 15 minutes 20  $\mu\text{mol}$  of Pd complex in 2 mL  $\text{CH}_2\text{Cl}_2$  was injected into the polymerization system via syringe. With rapid stirring, the reactor was pressurized and maintained at 8.0 atm of ethylene. After 3 h, solvent toluene was evaporated and the copolymer products were dried at 45°C in vacuum.

## 2. Mechanism investigation

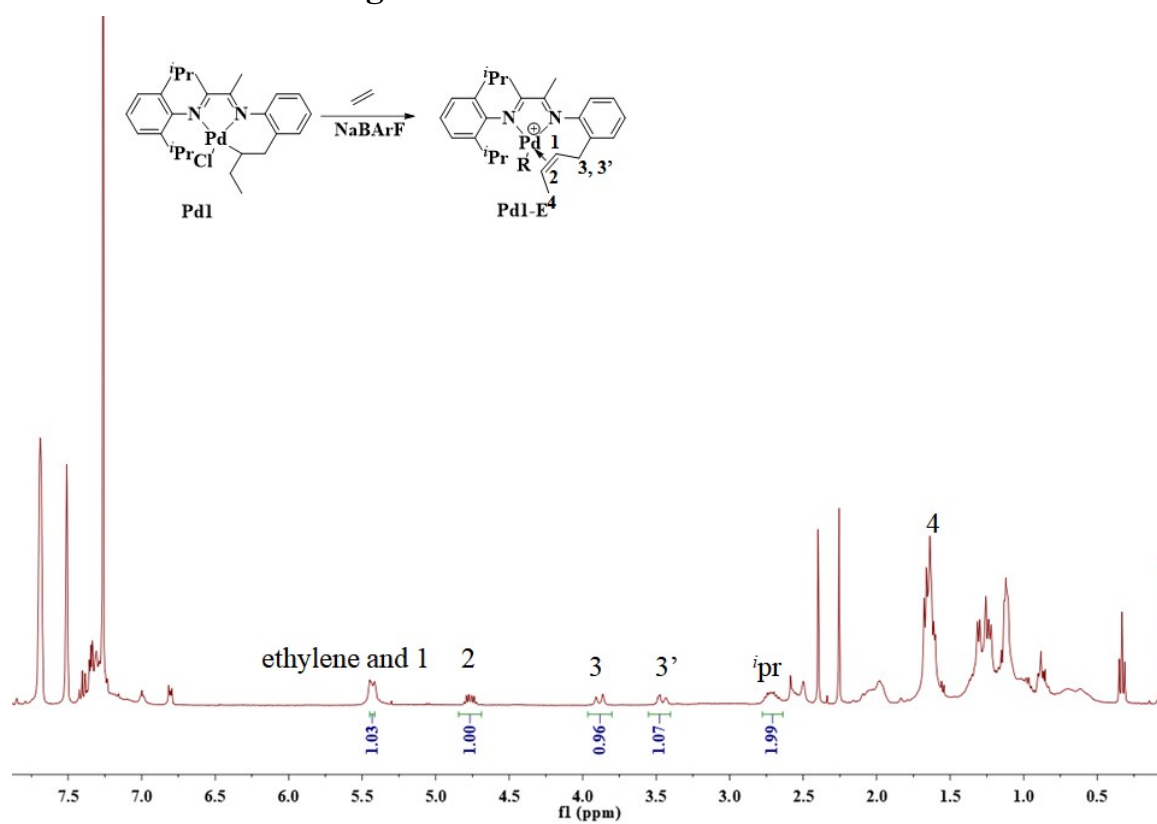

**Figure S1.** Insertion mechanism study using **Pd1** under stoichiometric ethylene at room temperature for 30 minutes. <sup>1</sup>H NMR spectrum of **Pd1-E** (CDCl<sub>3</sub>).

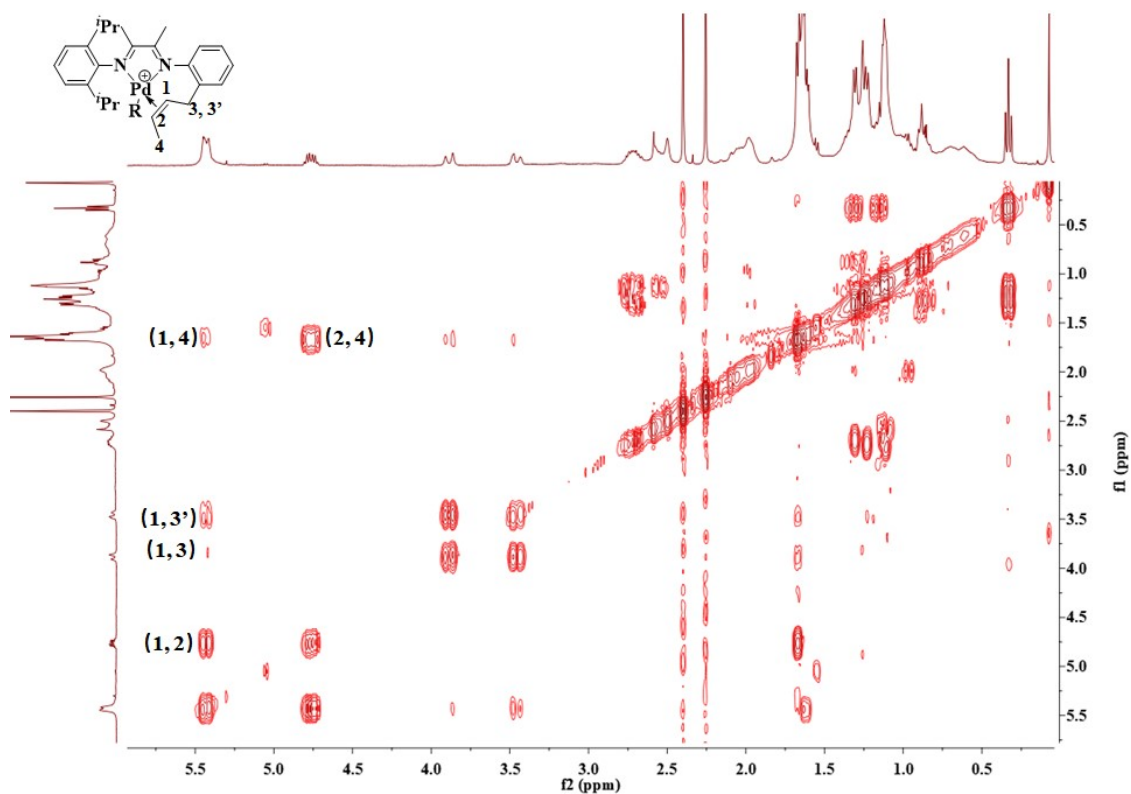

**Figure S2.** H-H COSY NMR spectrum of **Pd1-E** ( $\text{CDCl}_3$ ).

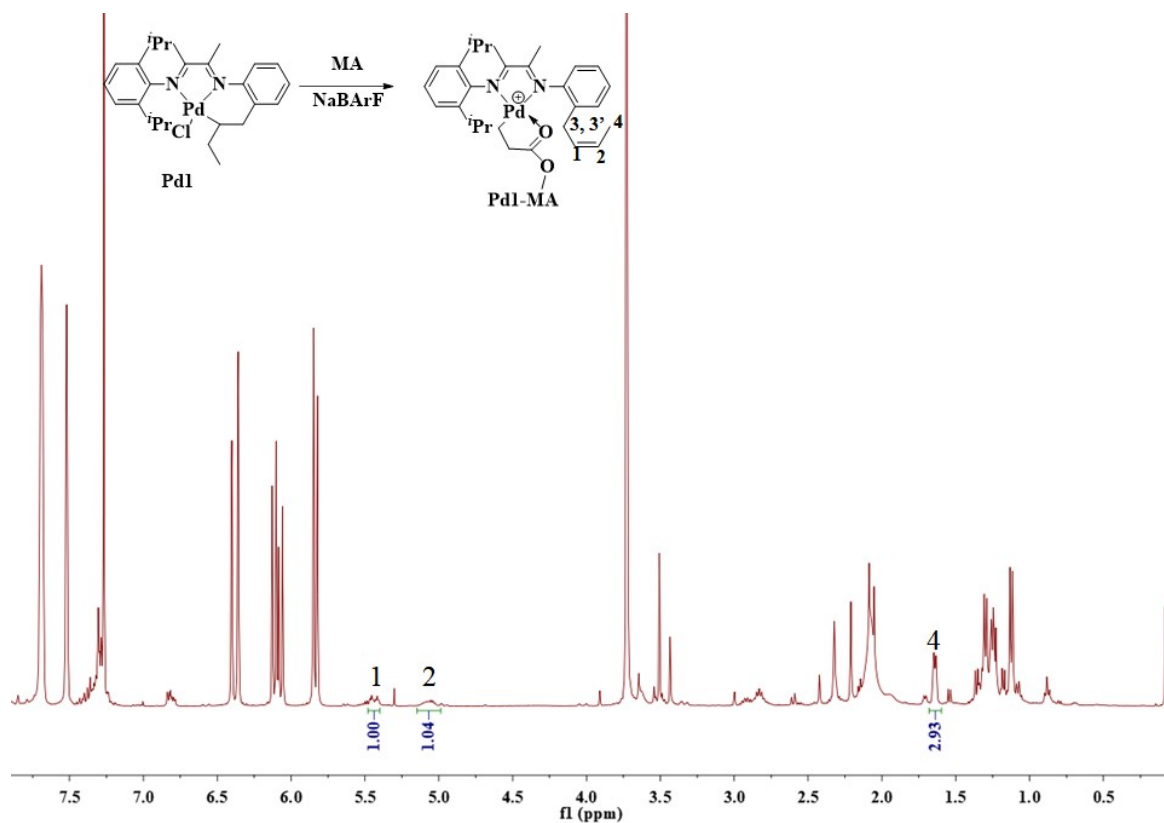

**Figure S3.** Insertion mechanism study using **Pd1** with 10 eq. of MA at room temperature for 30 minutes.  $^1\text{H}$  NMR spectrum of **Pd1-MA** ( $\text{CDCl}_3$ ).



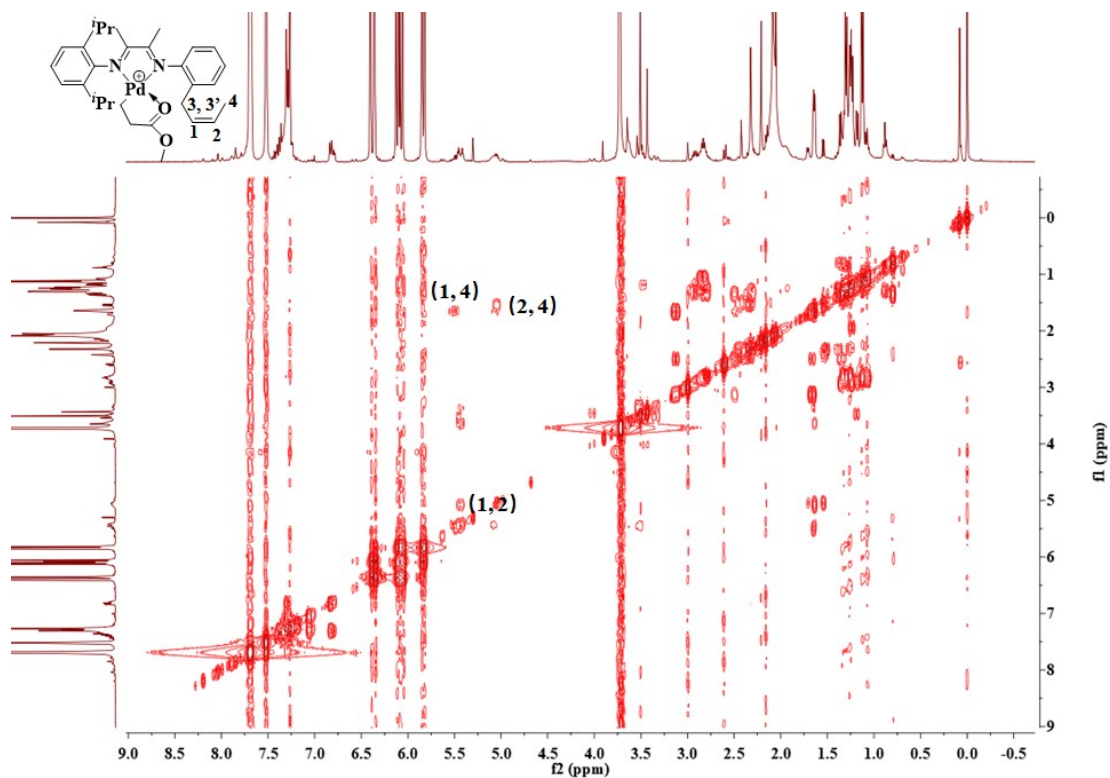

Figure S4. H-H COSY NMR spectrum of Pd1-MA ( $\text{CDCl}_3$ ).

### 3. $^1\text{H}$ NMR, $^{13}\text{C}$ NMR and MALDI-TOF-MS of ligands and catalysts

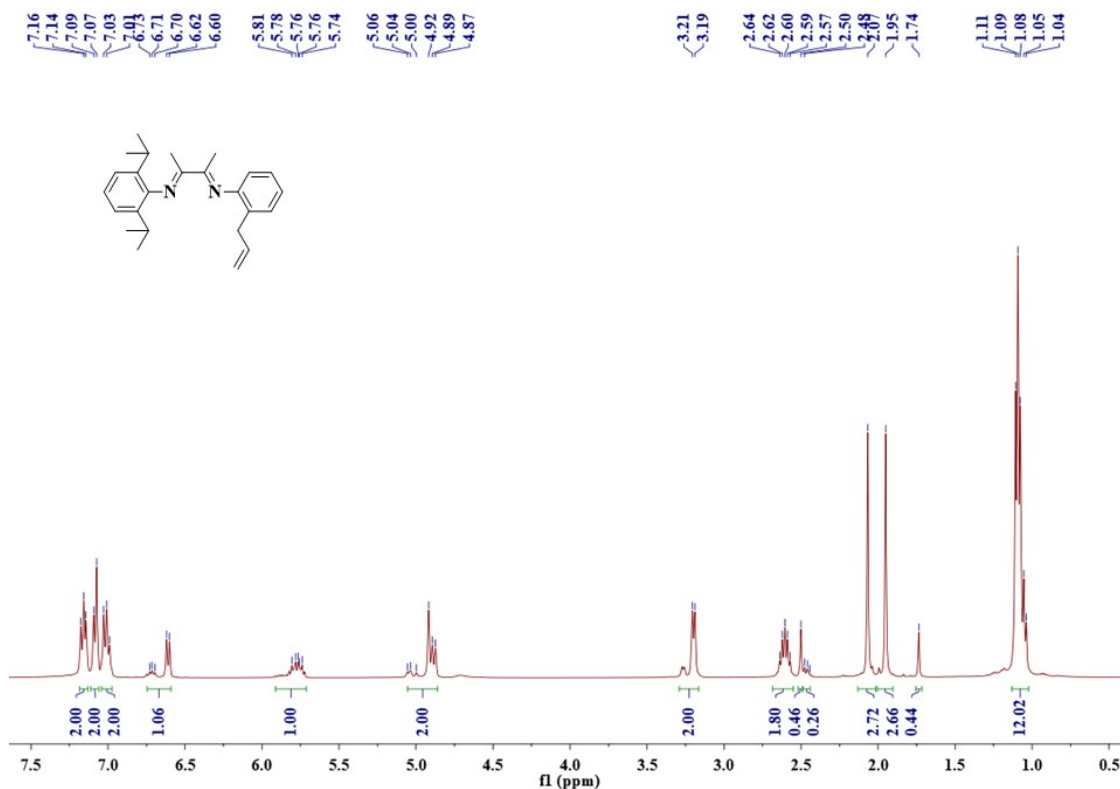

Figure S5.  $^1\text{H}$  NMR spectrum of L1 ( $\text{CDCl}_3$ ).

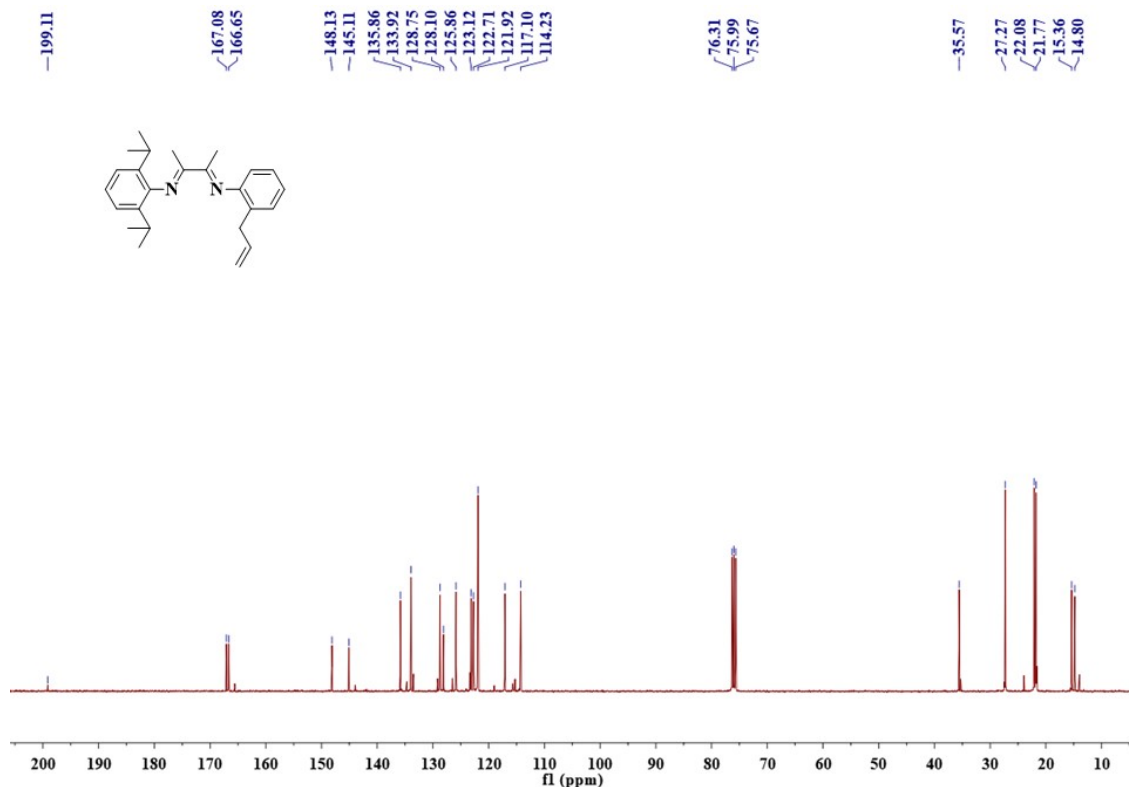

Figure S6. <sup>13</sup>C NMR spectrum of L1 (CDCl<sub>3</sub>).

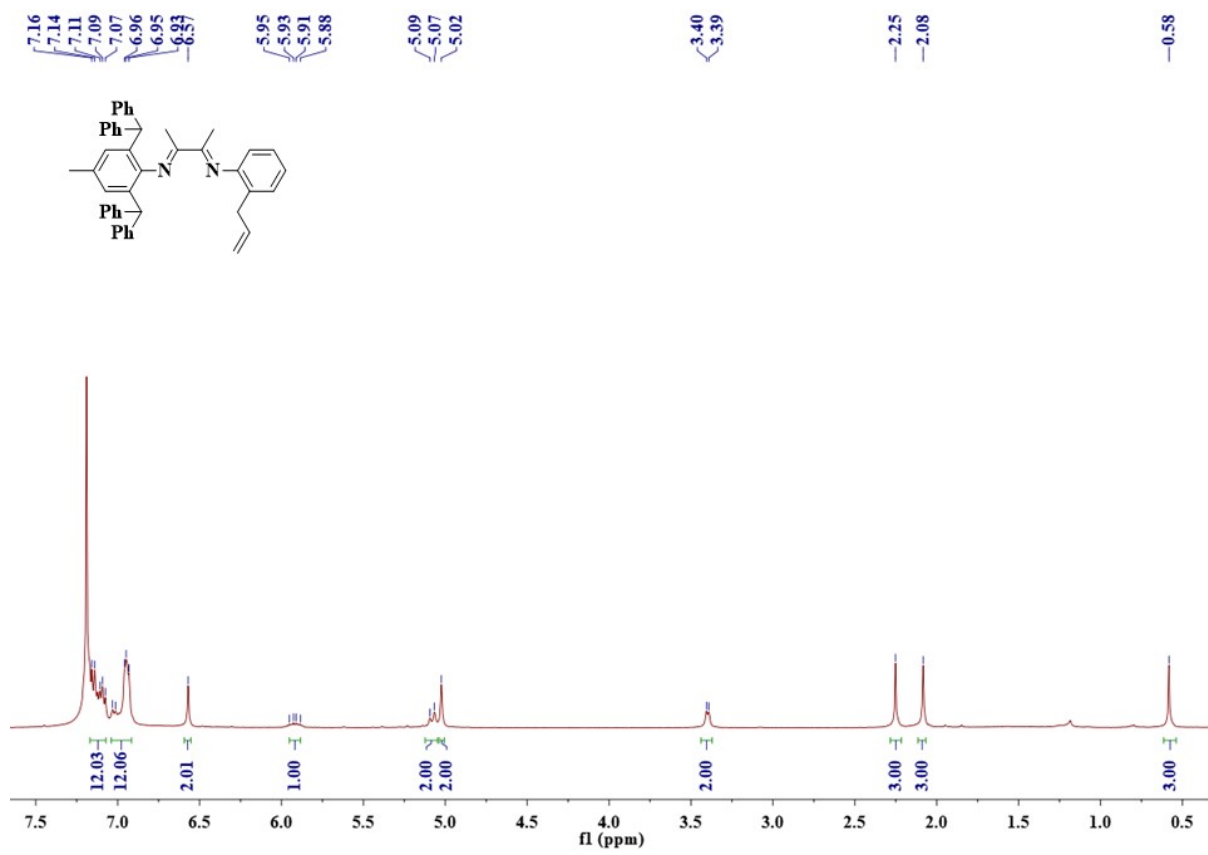

Figure S7. <sup>1</sup>H NMR spectrum of L2 (CDCl<sub>3</sub>).

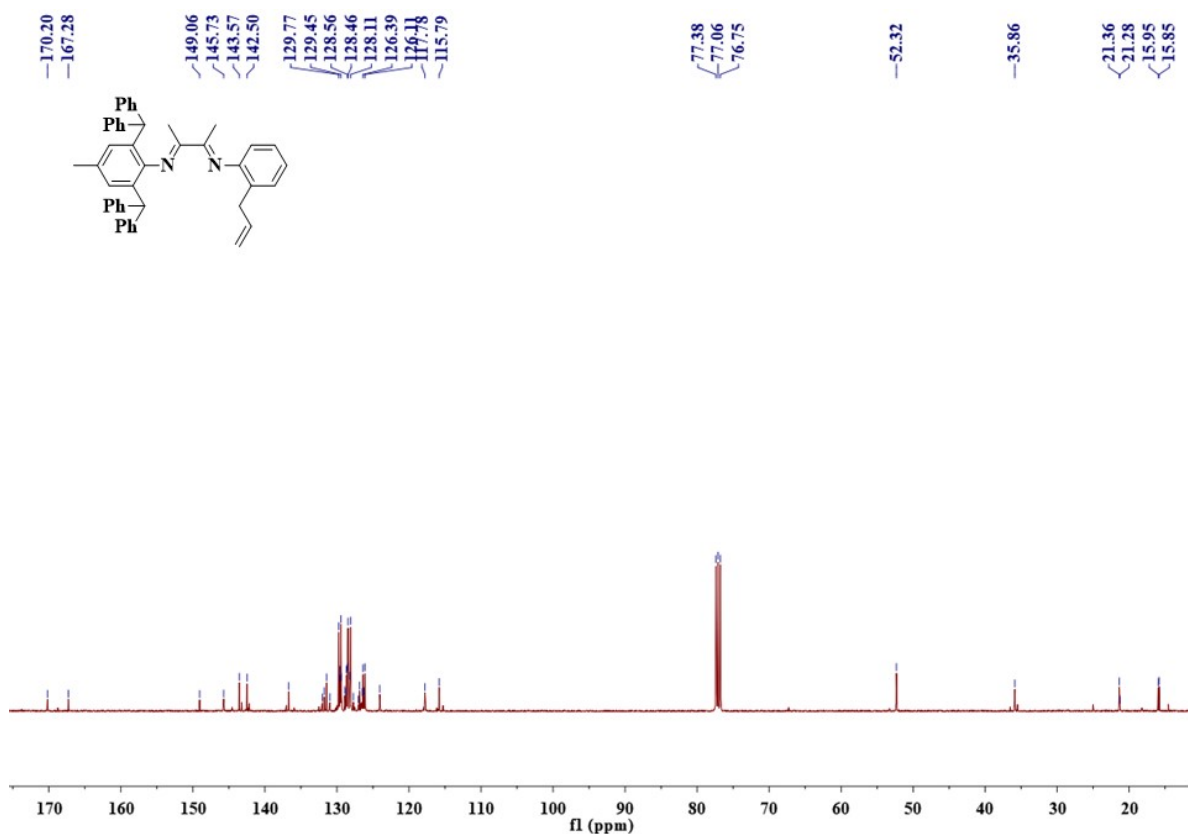

Figure S8. <sup>13</sup>C NMR spectrum of L2 (CDCl<sub>3</sub>).

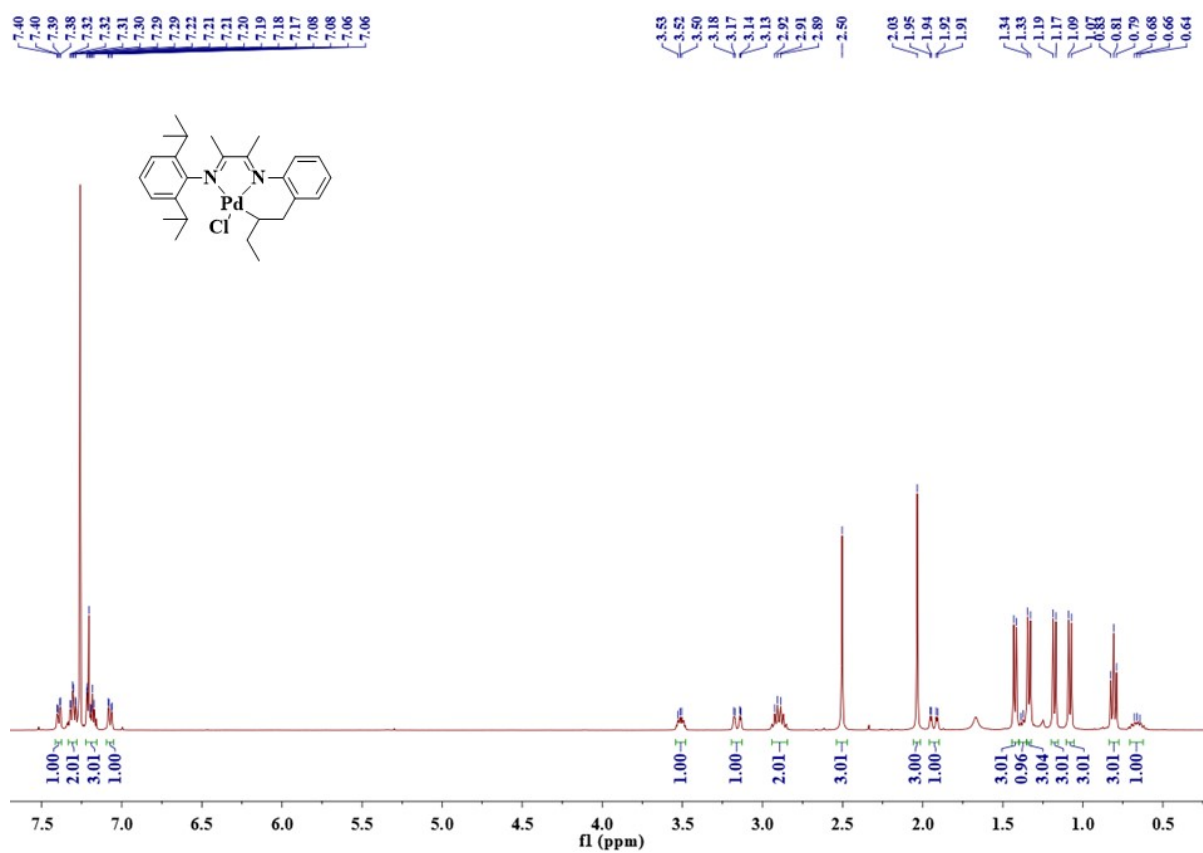

Figure S9. <sup>1</sup>H NMR spectrum of Pd1 (CDCl<sub>3</sub>).

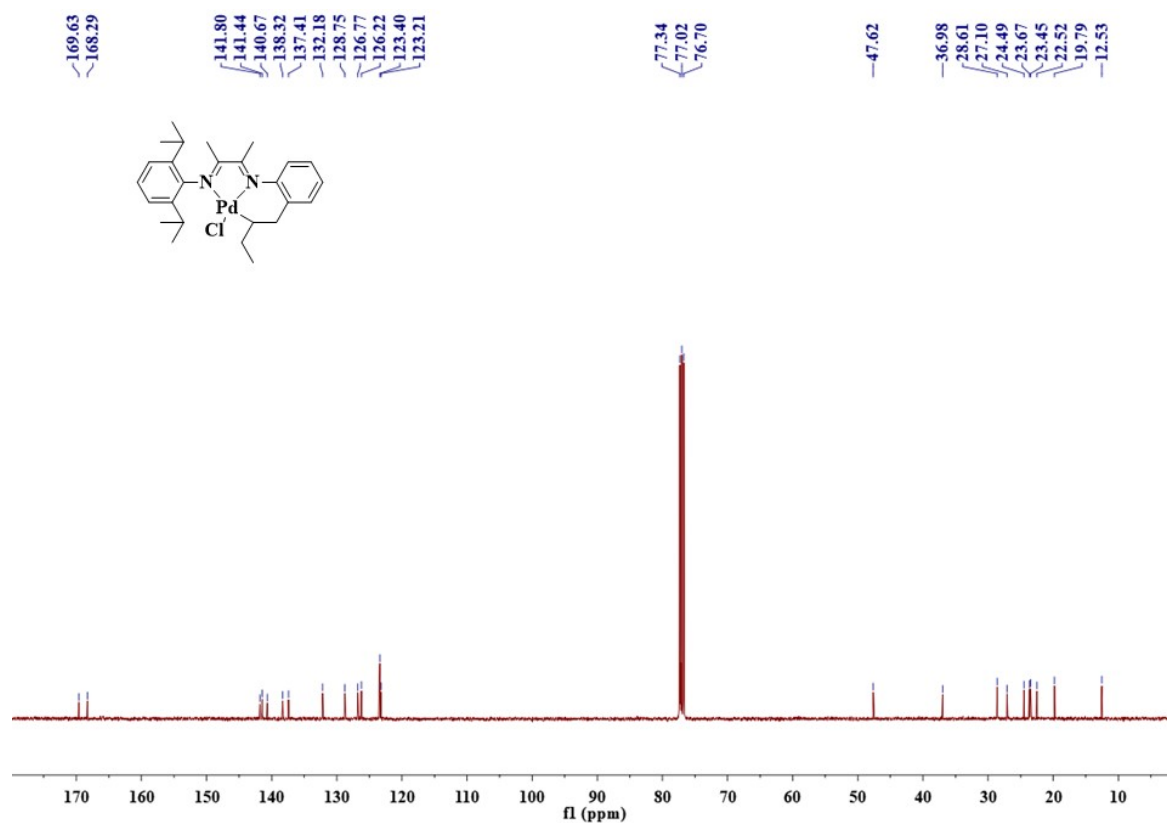

**Figure S10.**  $^{13}\text{C}$  NMR spectrum of Pd1 ( $\text{CDCl}_3$ ).

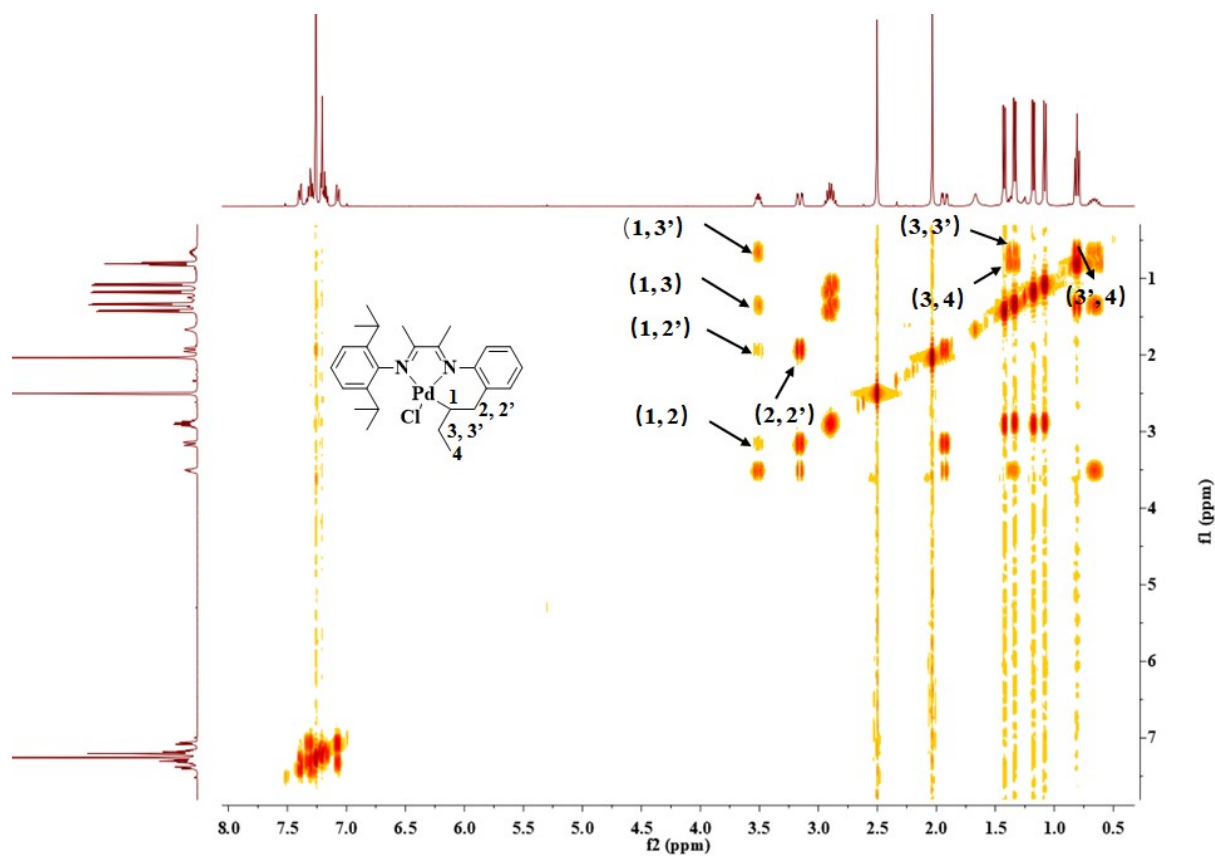

**Figure S11.** H-H COSY NMR spectrum of Pd1 ( $\text{CDCl}_3$ ).

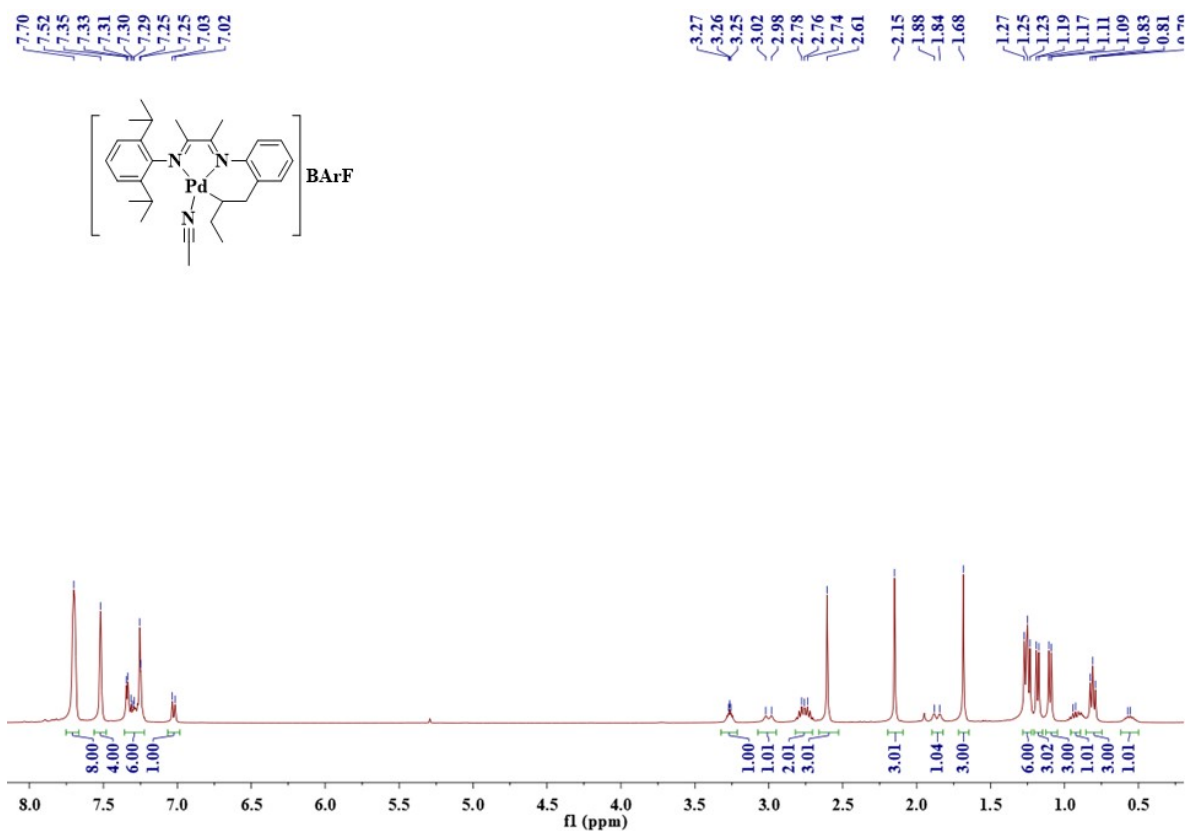

Figure S12. <sup>1</sup>H NMR spectrum of Pd1-ACN (CDCl<sub>3</sub>).

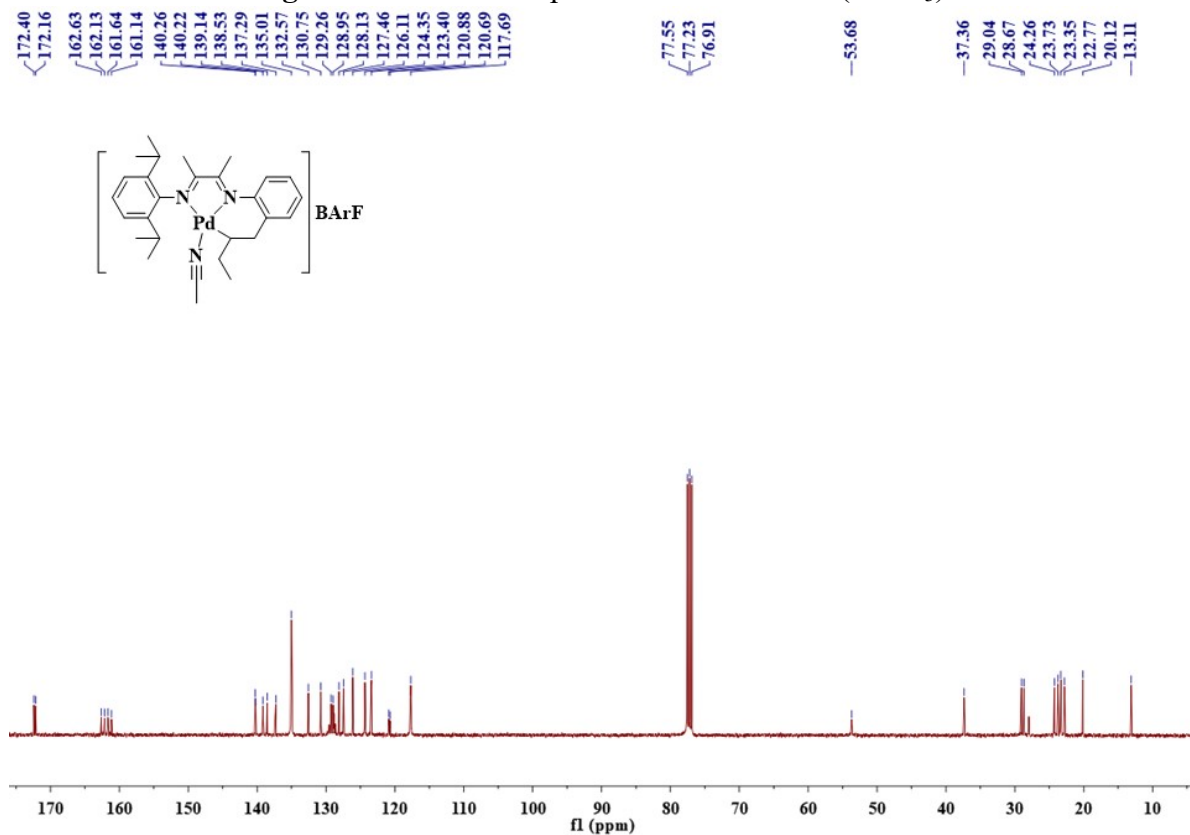

Figure S13. <sup>13</sup>C NMR spectrum of Pd1-ACN (CDCl<sub>3</sub>).

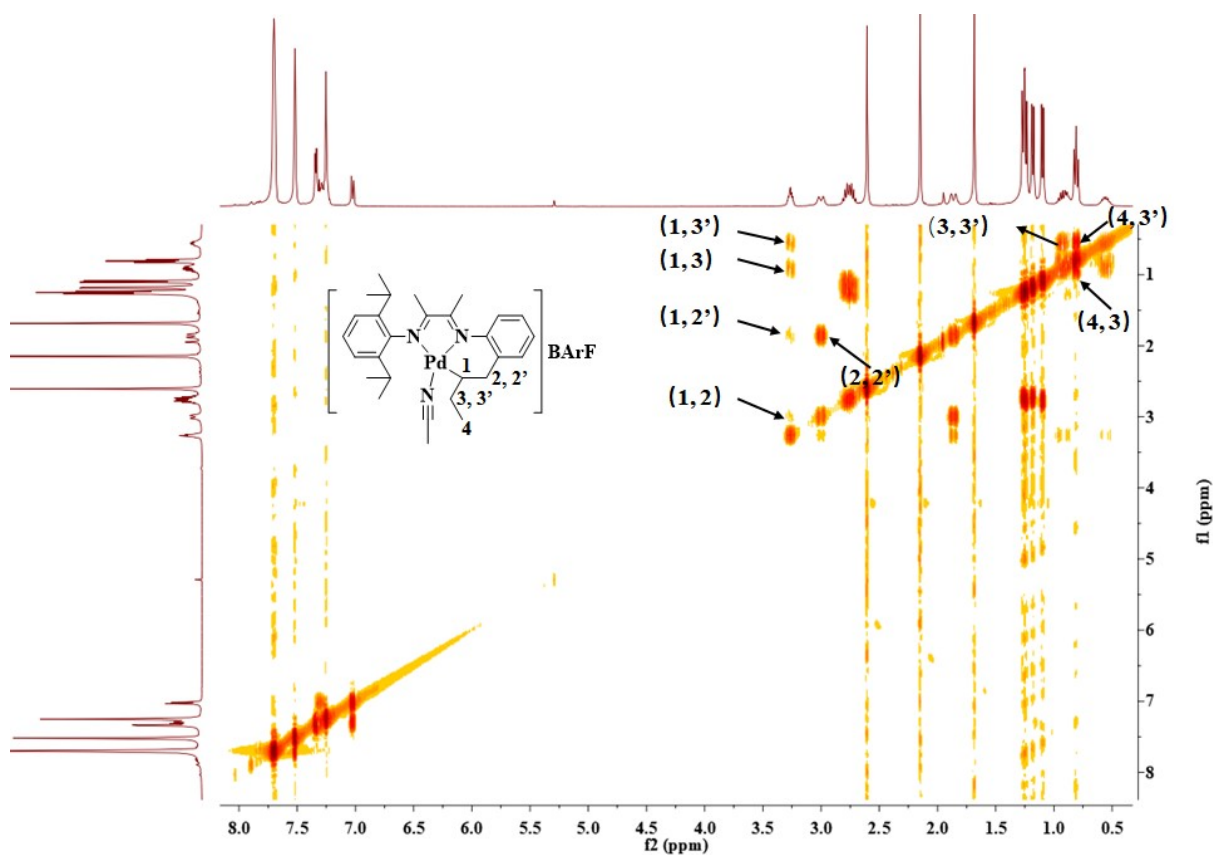

Figure S14. H-H COSY NMR spectrum of Pd1-ACN ( $\text{CDCl}_3$ ).

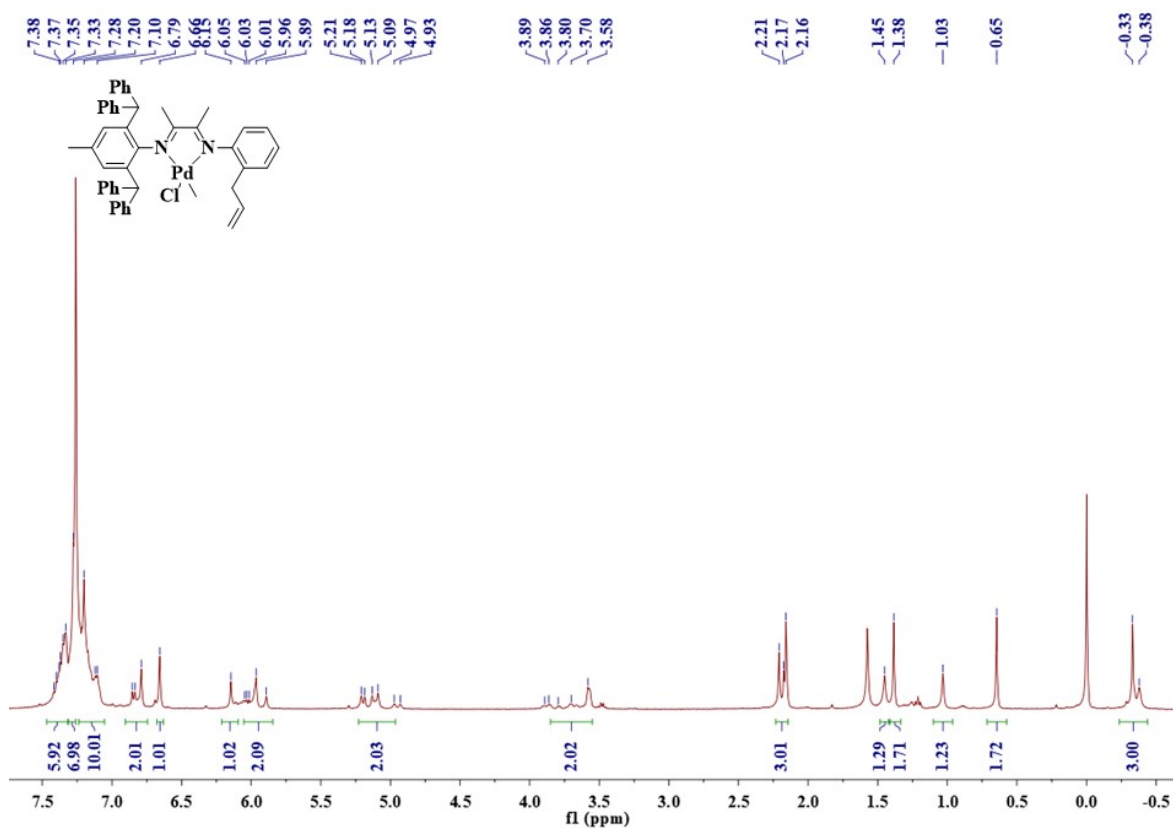

Figure S15.  $^1\text{H}$  NMR spectrum of Pd2 ( $\text{CDCl}_3$ ).

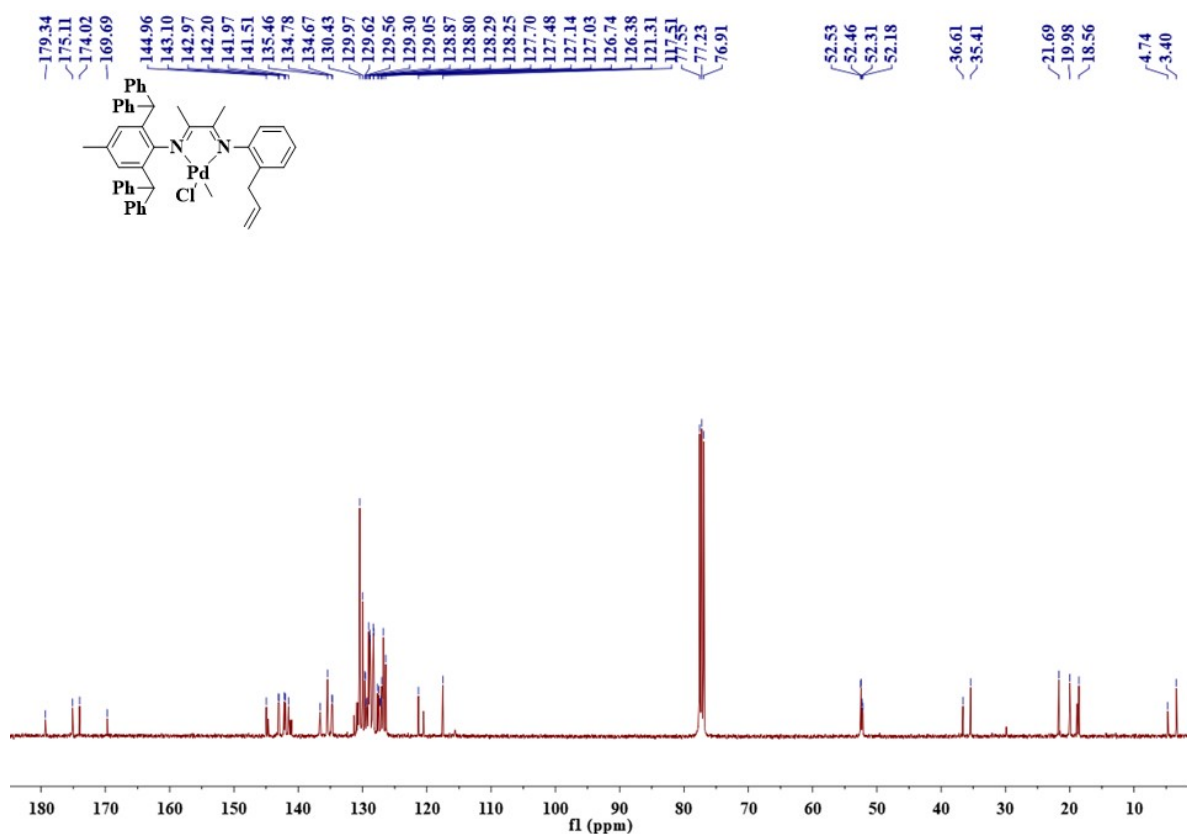

Figure S16. <sup>13</sup>C NMR spectrum of Pd2 (CDCl<sub>3</sub>).

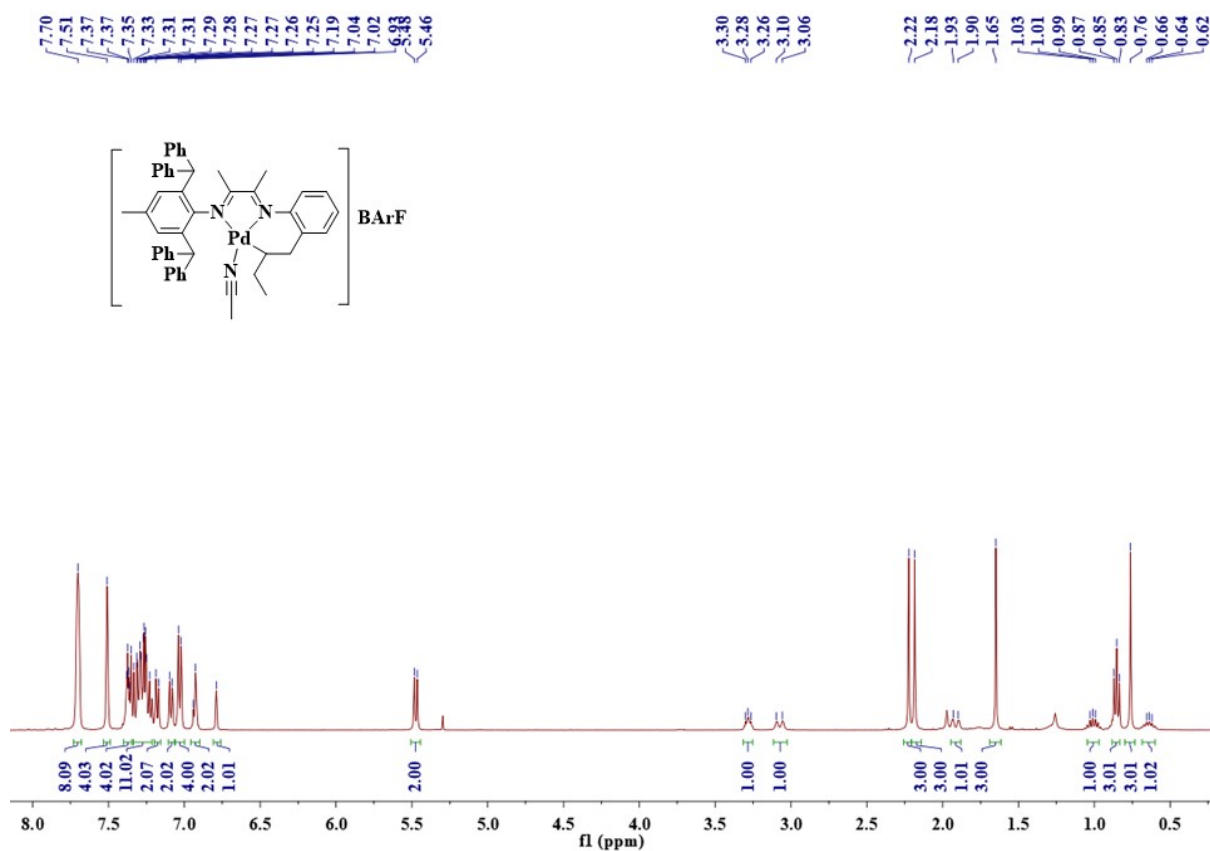

Figure S17. <sup>1</sup>H NMR spectrum of Pd2-ACN (CDCl<sub>3</sub>).

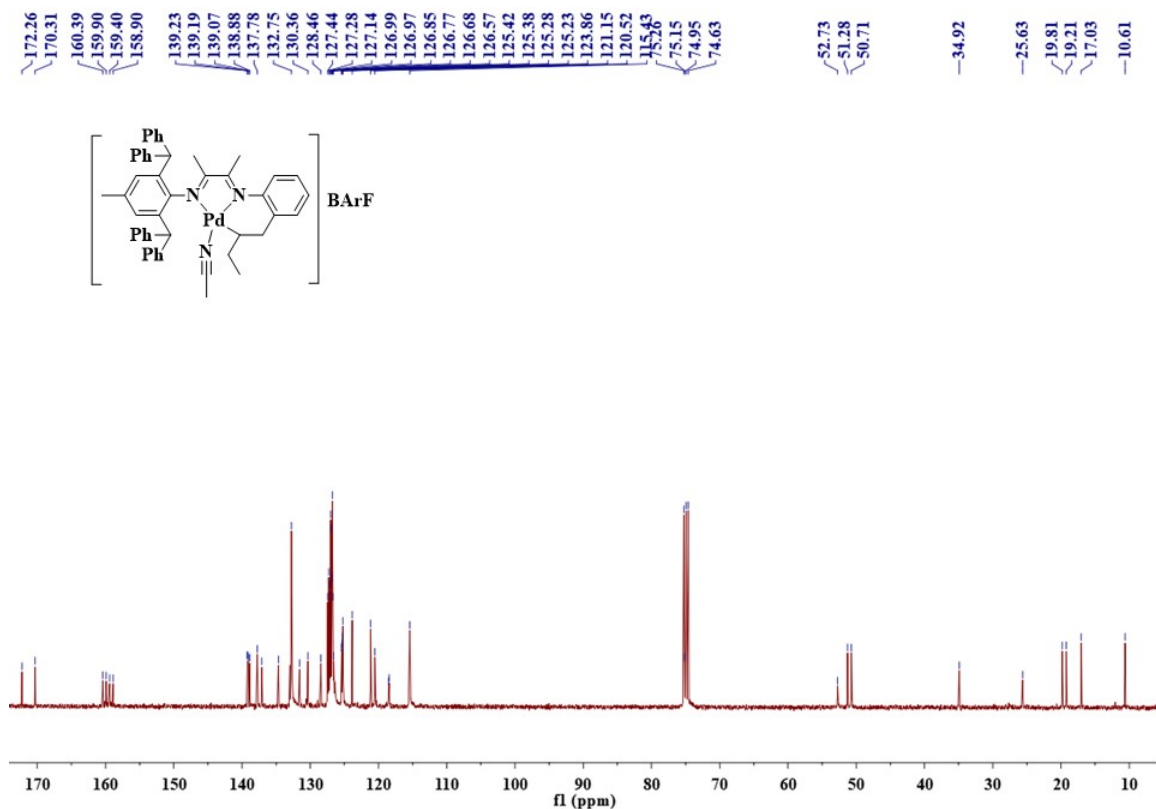

Figure S18.  $^{13}\text{C}$  NMR spectrum of Pd2-ACN ( $\text{CDCl}_3$ ).

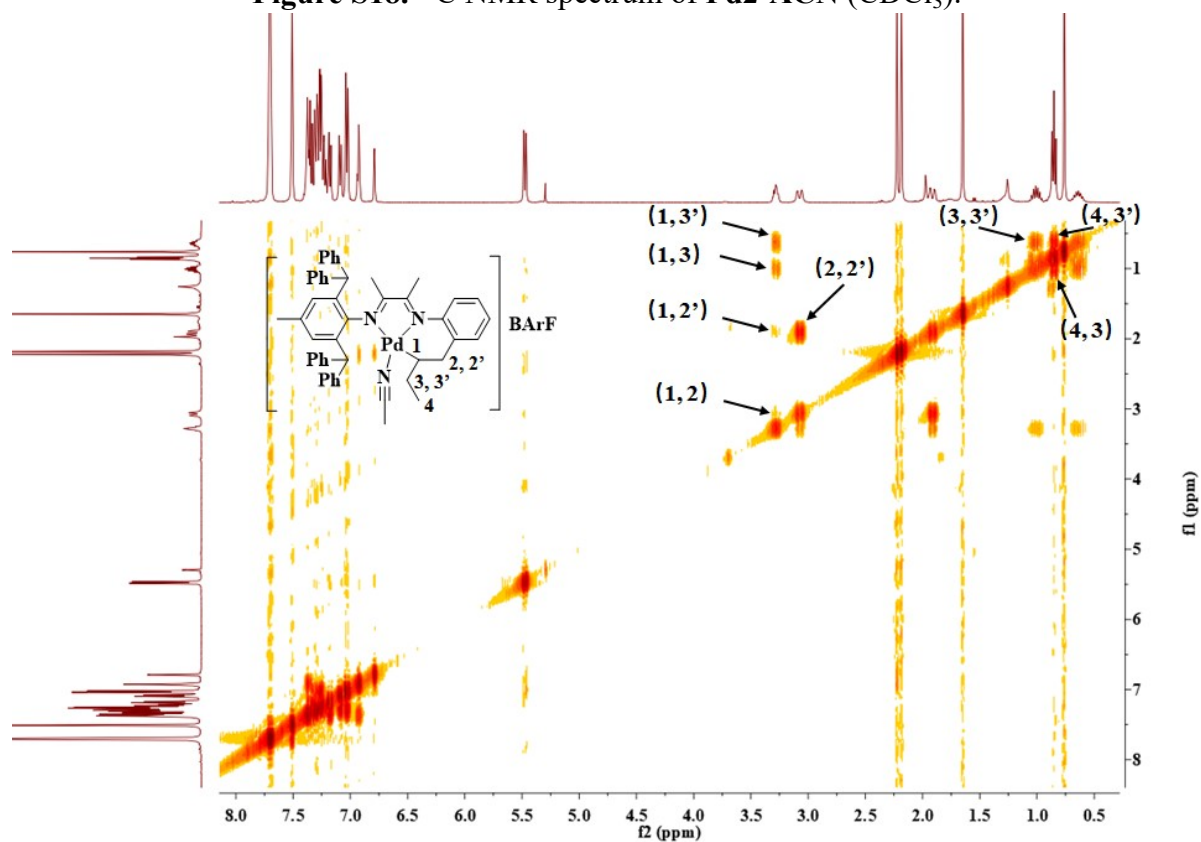

Figure S19. H-H COSY NMR spectrum of Pd2-ACN ( $\text{CDCl}_3$ ).



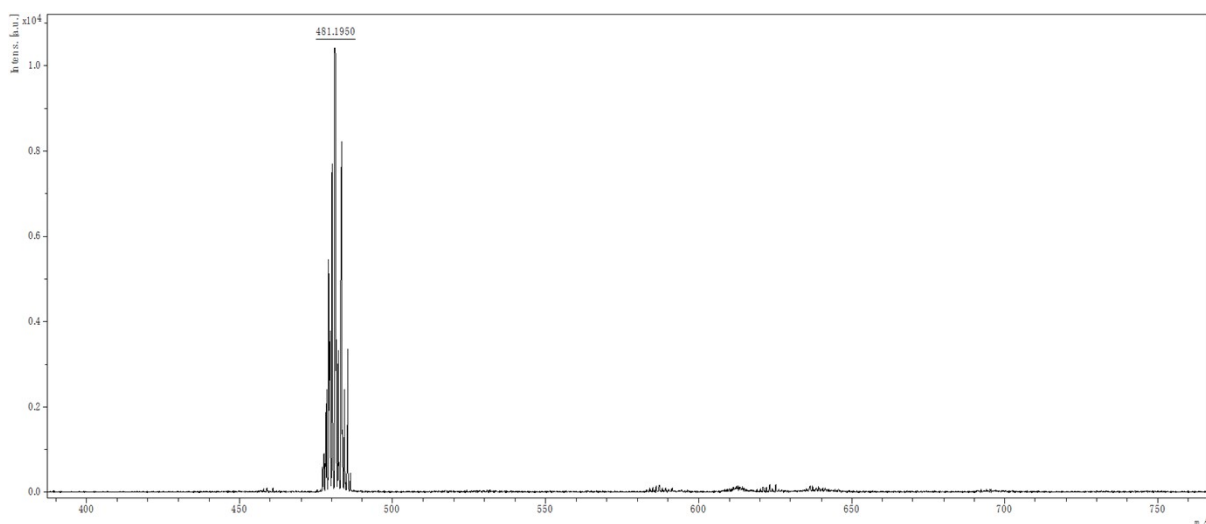

**Figure S20.** MALDI-TOF-MS (m/z) of complex **Pd1**.

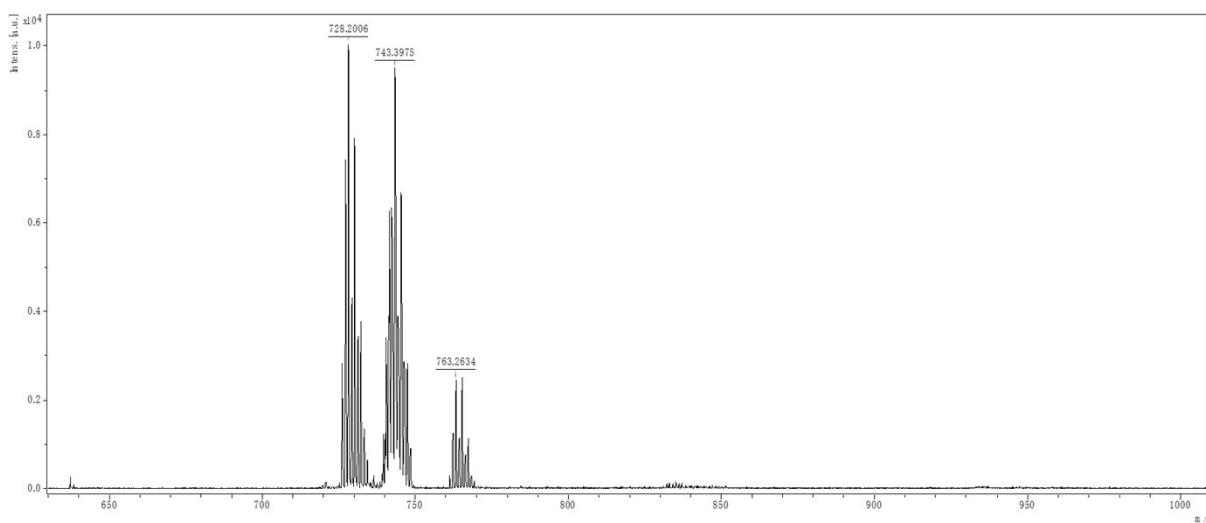

**Figure S21.** MALDI-TOF-MS of complex **Pd2**.

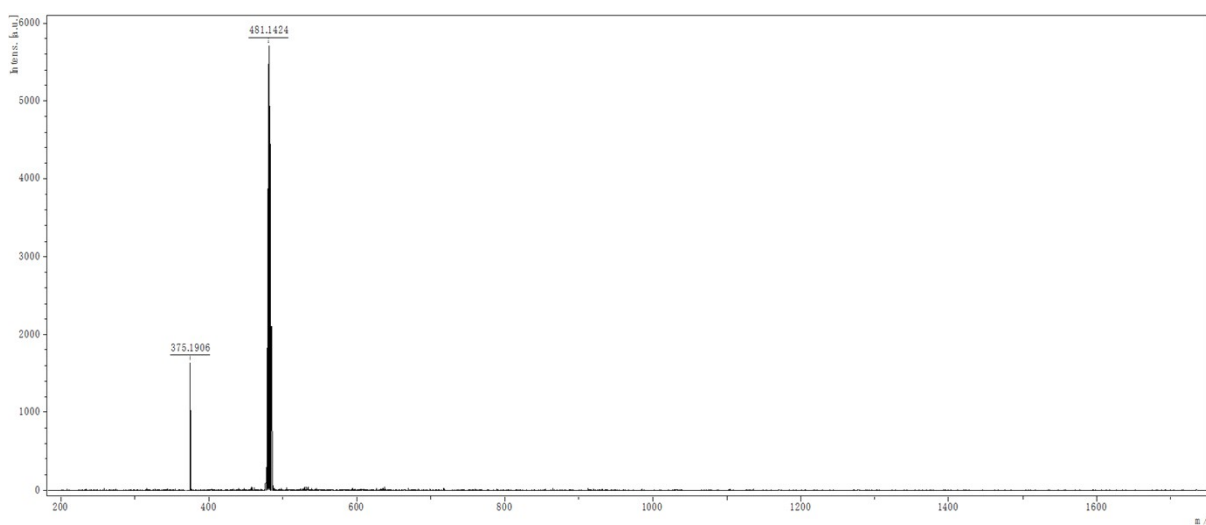

**Figure S22.** MALDI-TOF-MS of complex **Pd1-ACN**.

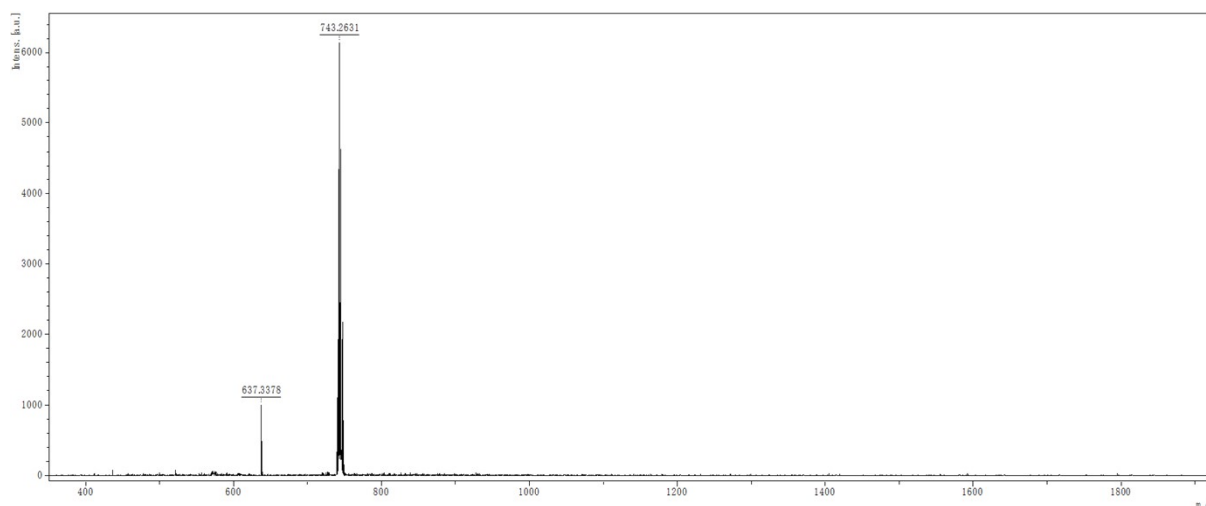

Figure S23. MALDI-TOF-MS of complex Pd<sub>2</sub>-ACN.

#### 4. <sup>1</sup>H NMR of the Polymers

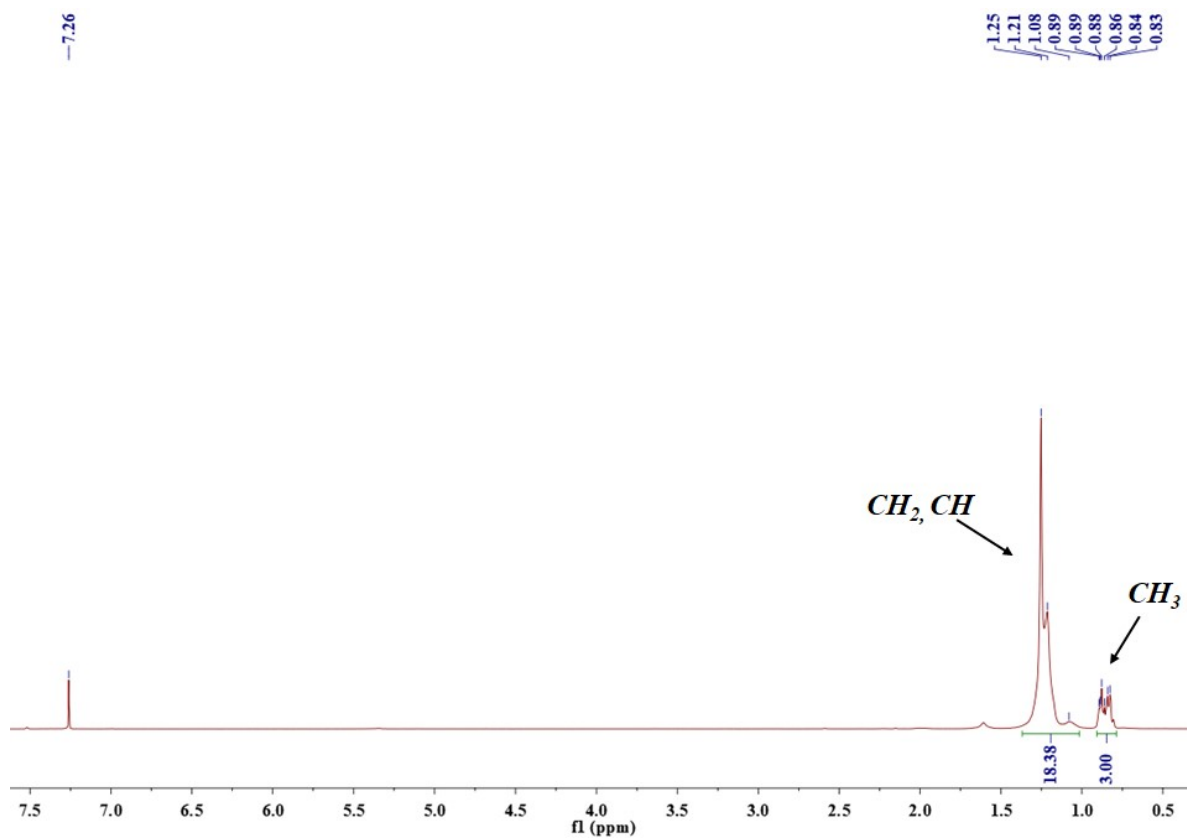

Figure S24. <sup>1</sup>H NMR spectrum of the polymer from Table 1, Entry 2 (CDCl<sub>3</sub>).

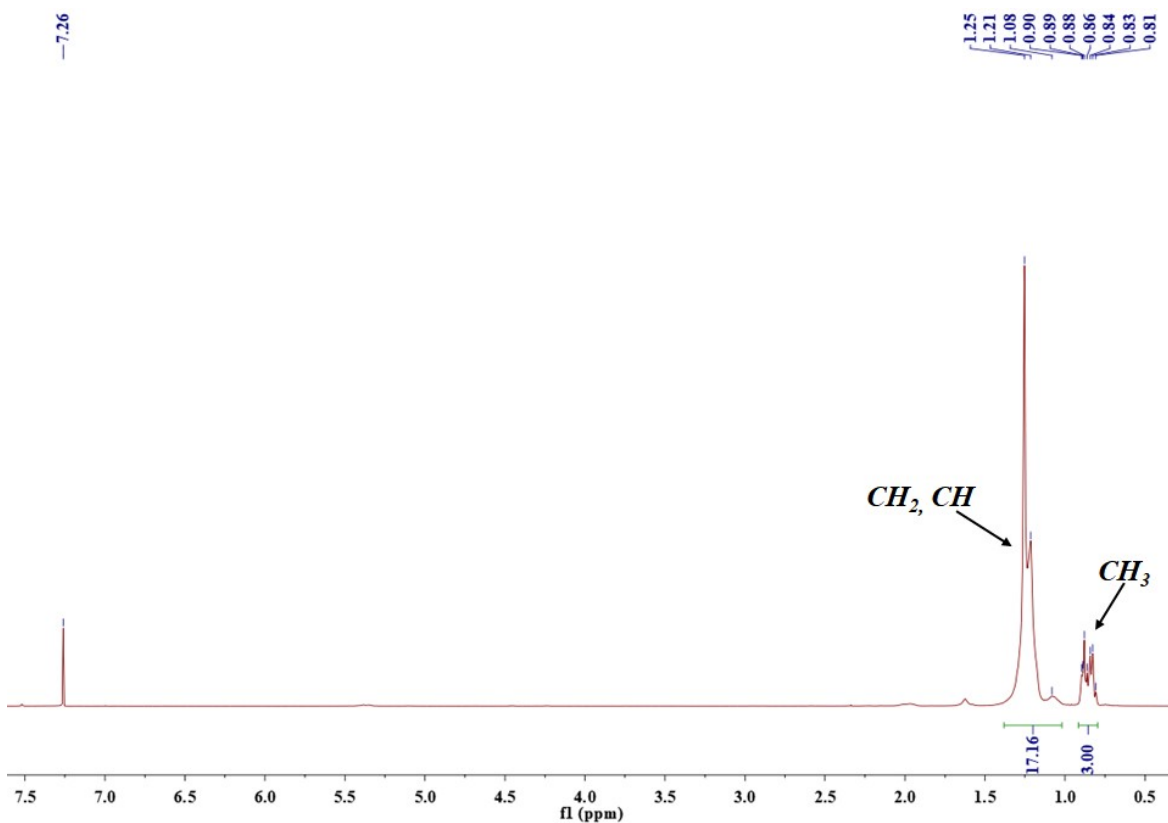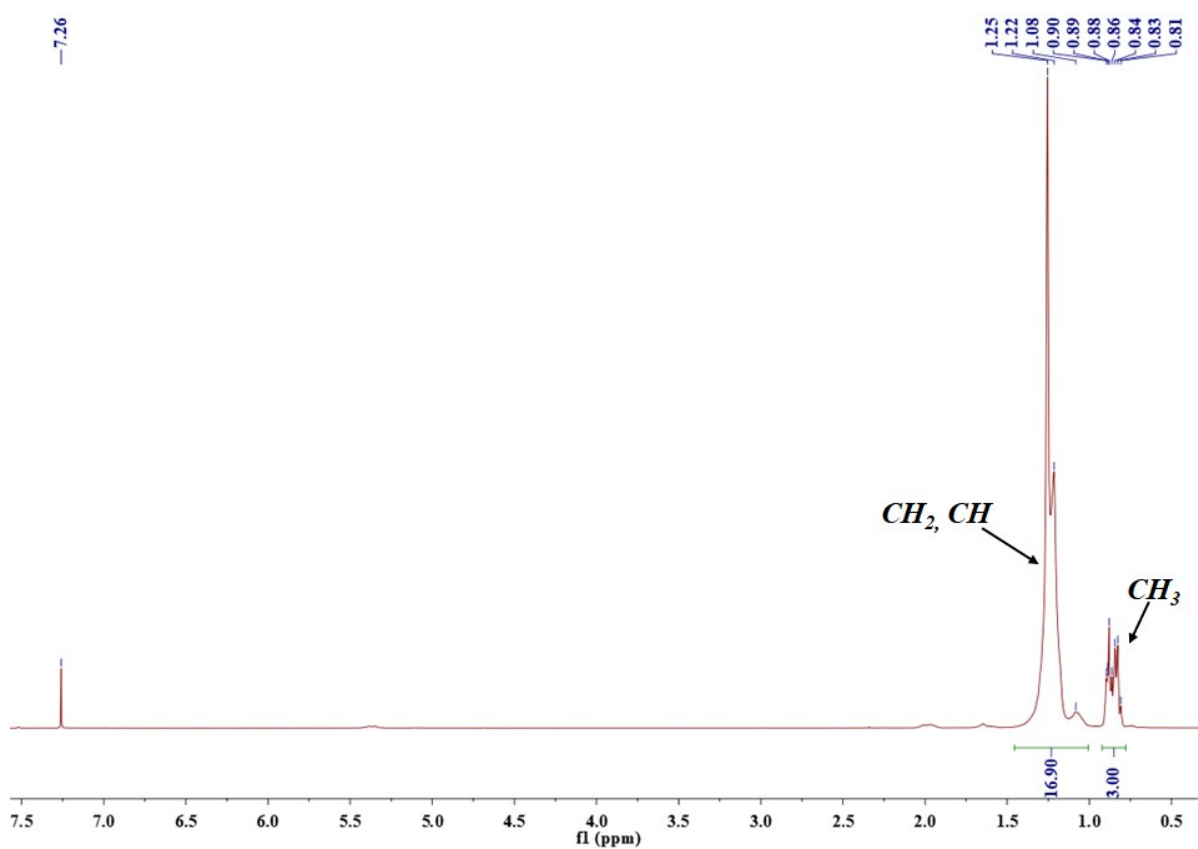

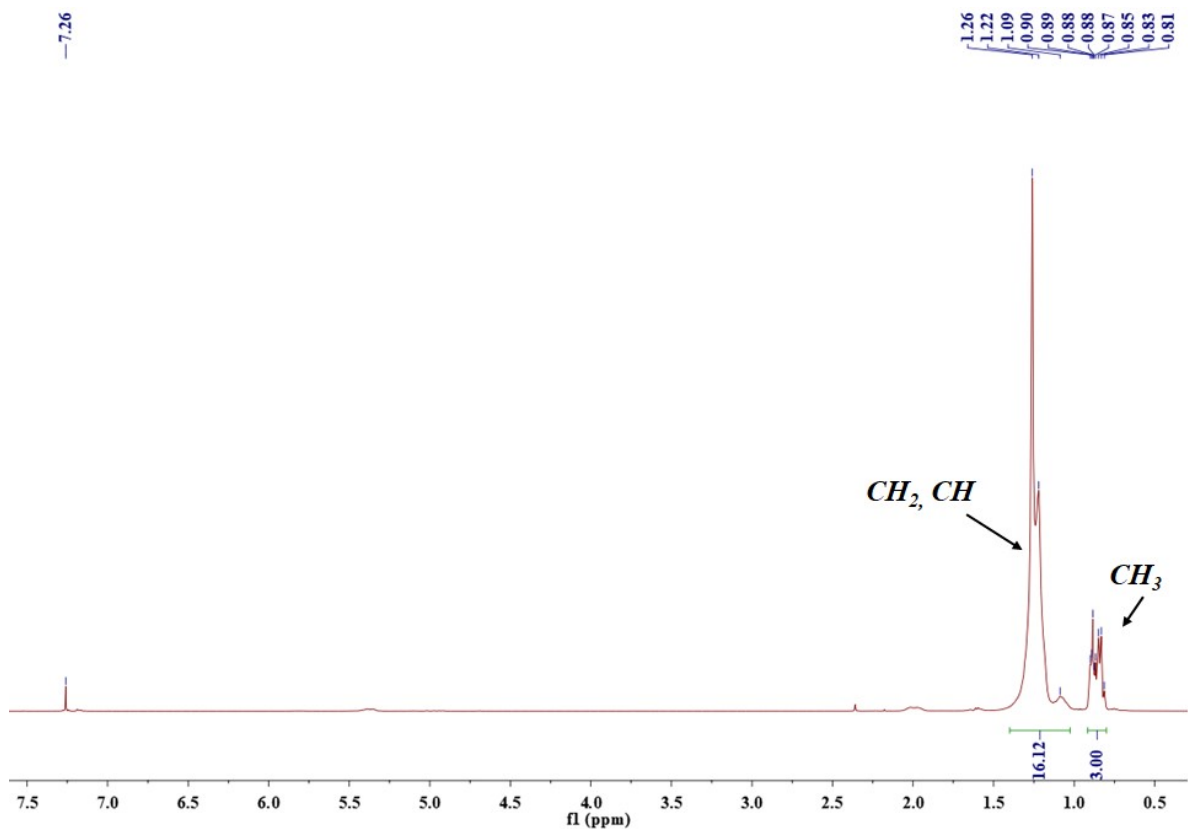

Figure S27.  $^1H$  NMR spectrum of the polymer from Table 1, Entry 5 ( $CDCl_3$ ).

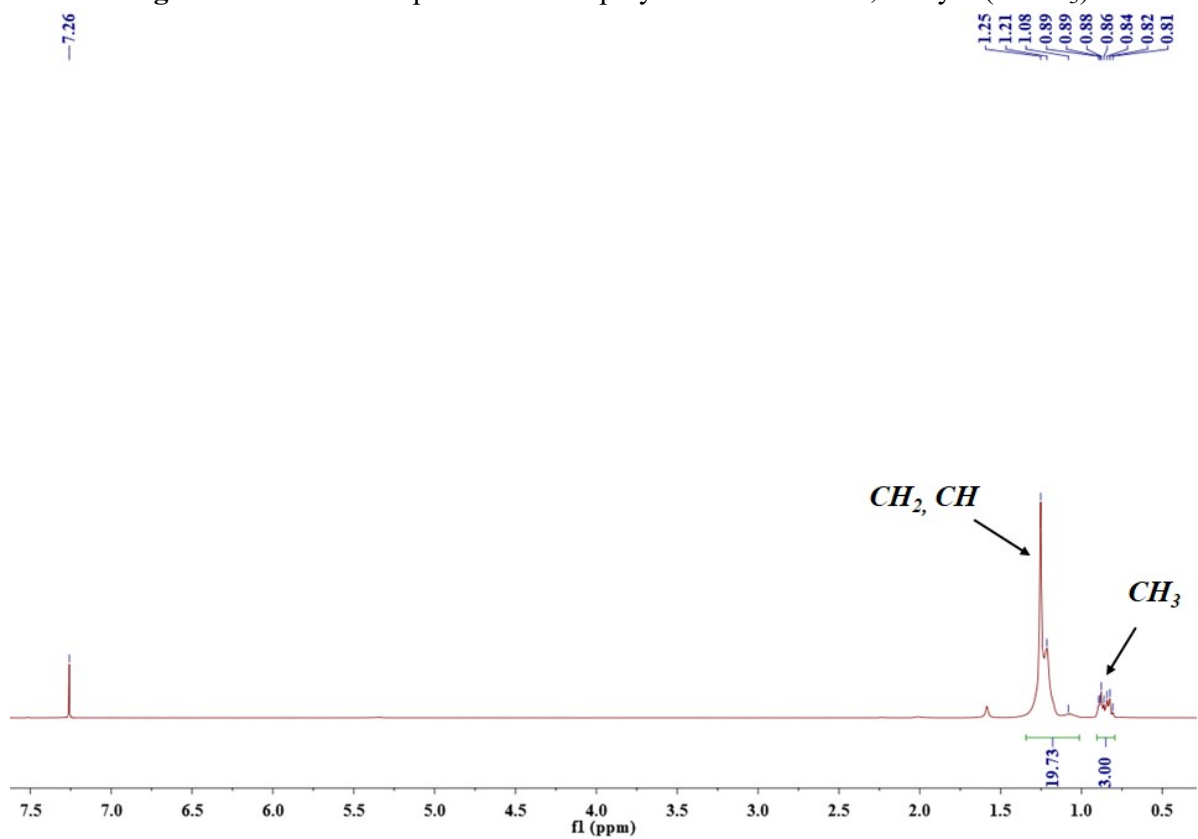

Figure S28.  $^1H$  NMR spectrum of the polymer from Table 1, Entry 6 ( $CDCl_3$ ).

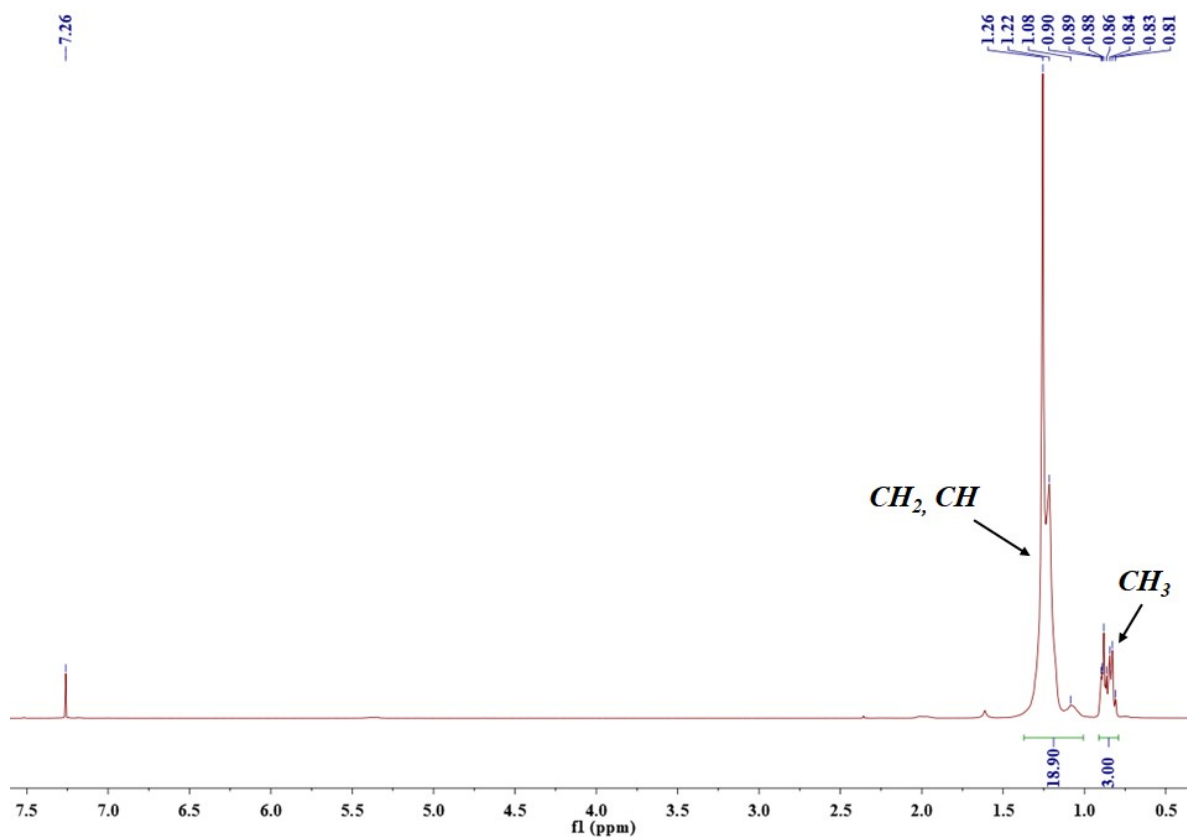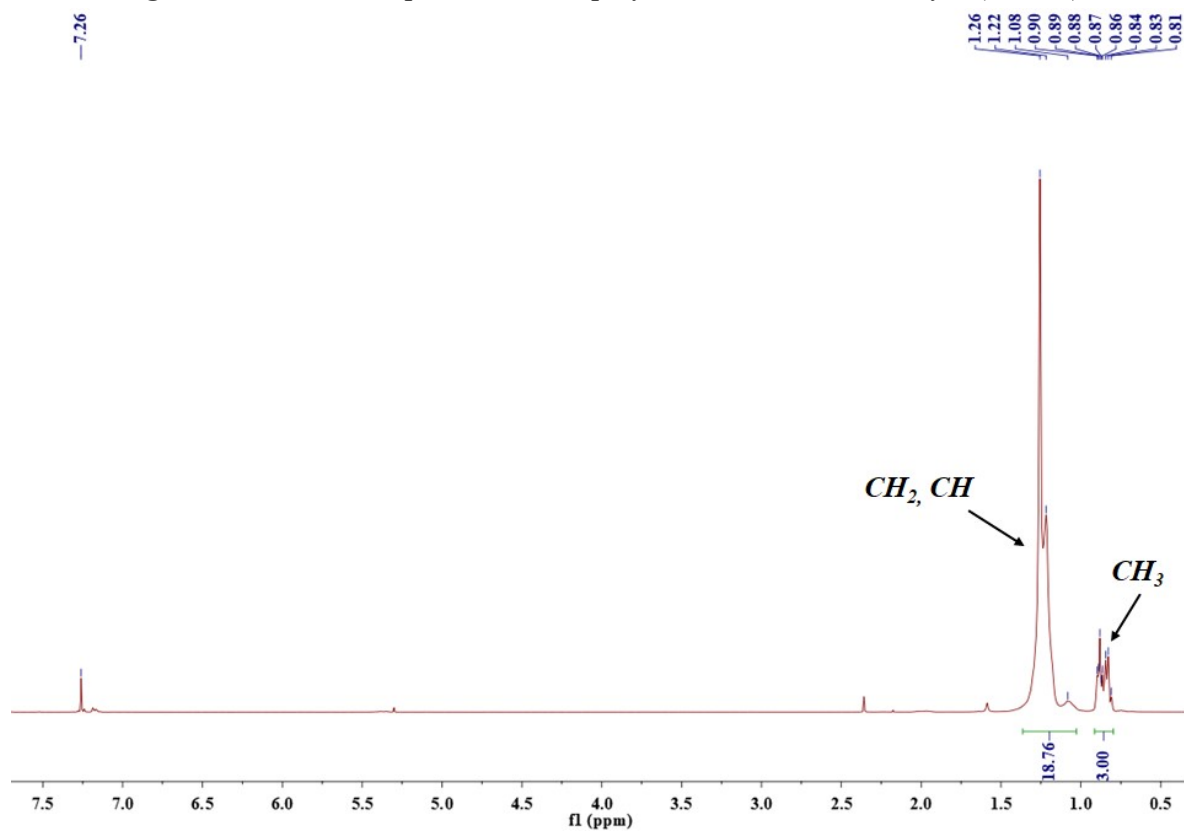

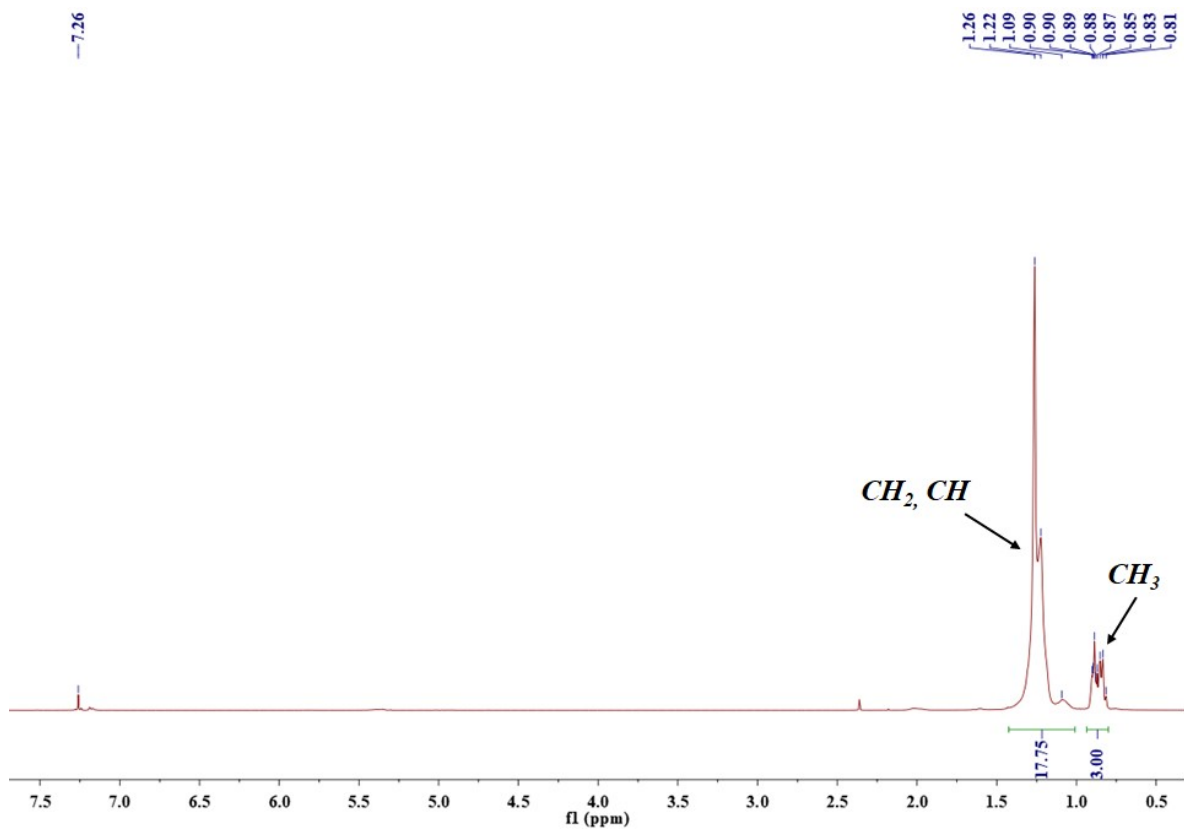

**Figure S31.**  $^1\text{H}$  NMR spectrum of the polymer from Table 1, Entry 9 ( $\text{CDCl}_3$ ).

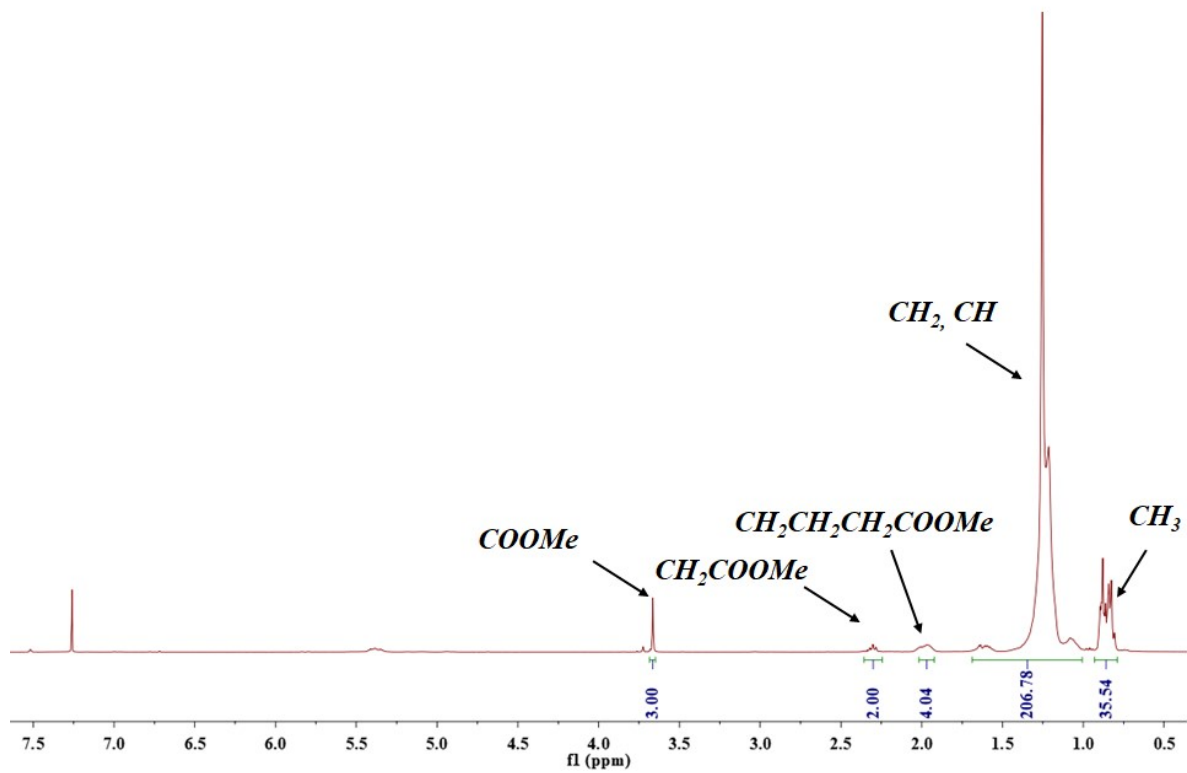

**Figure S32.**  $^1\text{H}$  NMR spectrum of the polymer from Table 2, Entry 1 ( $\text{CDCl}_3$ ).

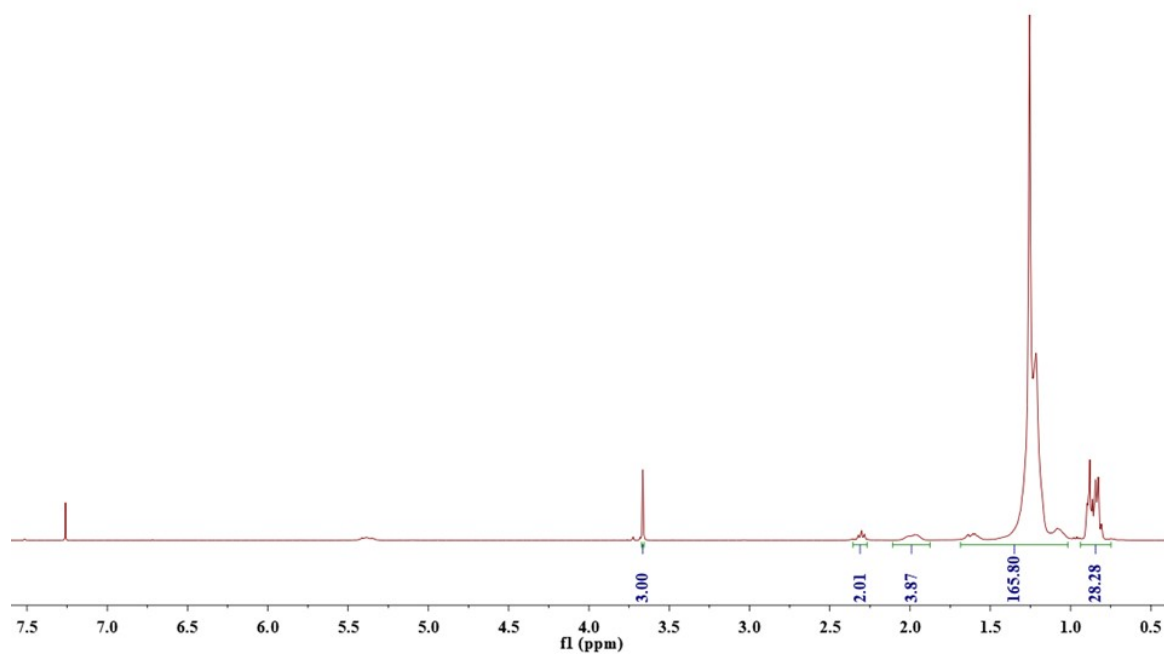

**Figure S33.** <sup>1</sup>H NMR spectrum of the polymer from Table 2, Entry 2 (CDCl<sub>3</sub>).

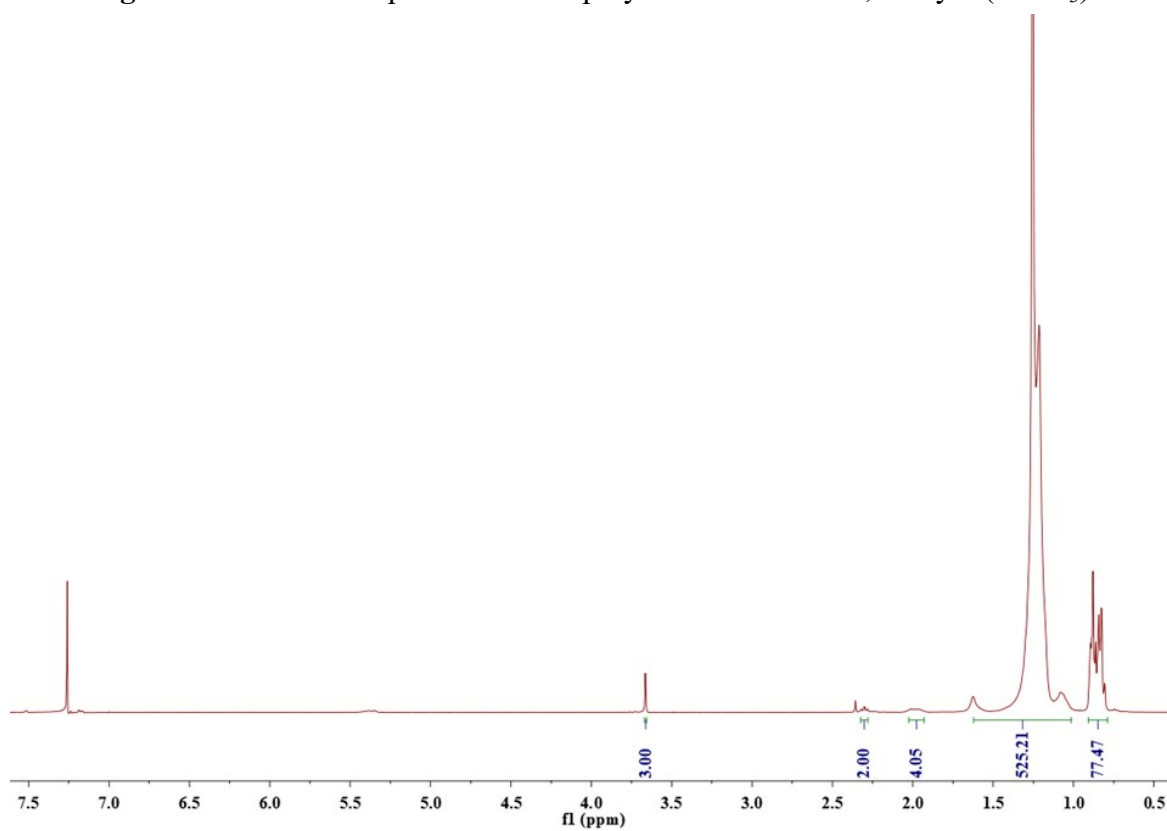

**Figure S34.** <sup>1</sup>H NMR spectrum of the polymer from Table 2, Entry 4 (CDCl<sub>3</sub>).

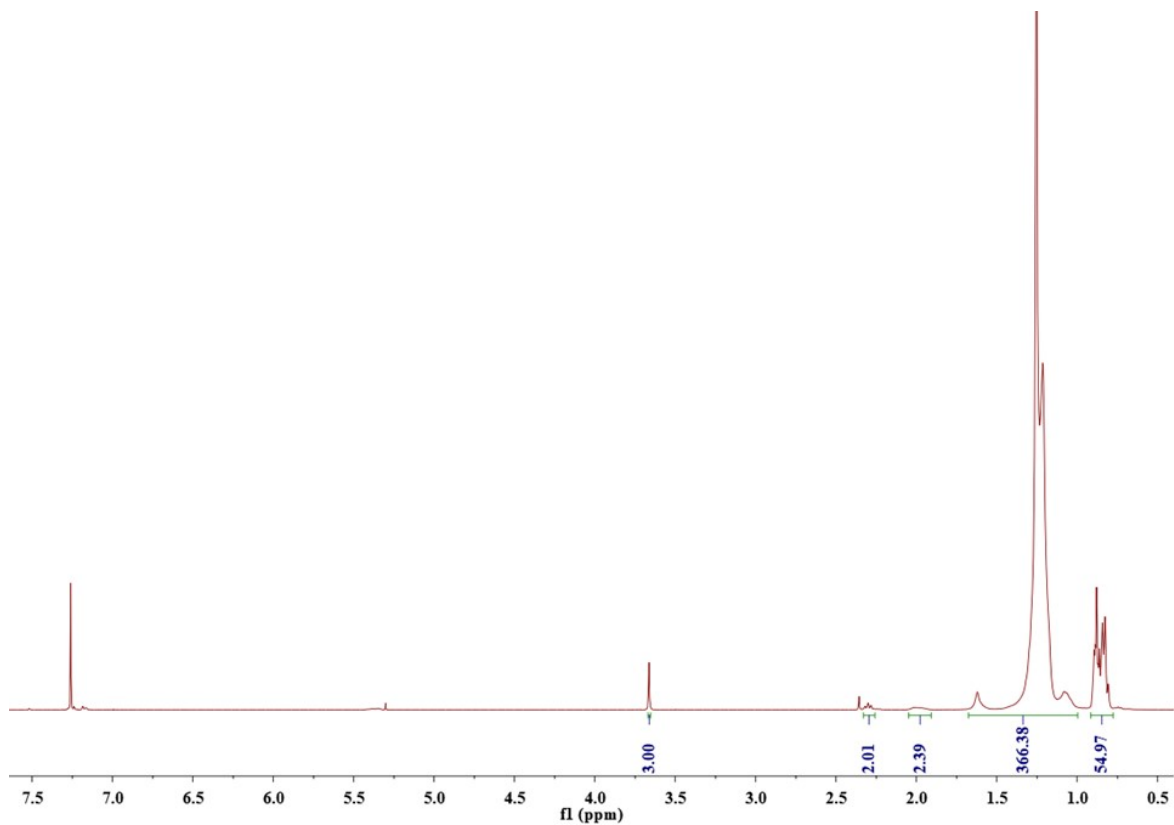

**Figure S35.** <sup>1</sup>H NMR spectrum of the polymer from Table 2, Entry 5 (CDCl<sub>3</sub>).

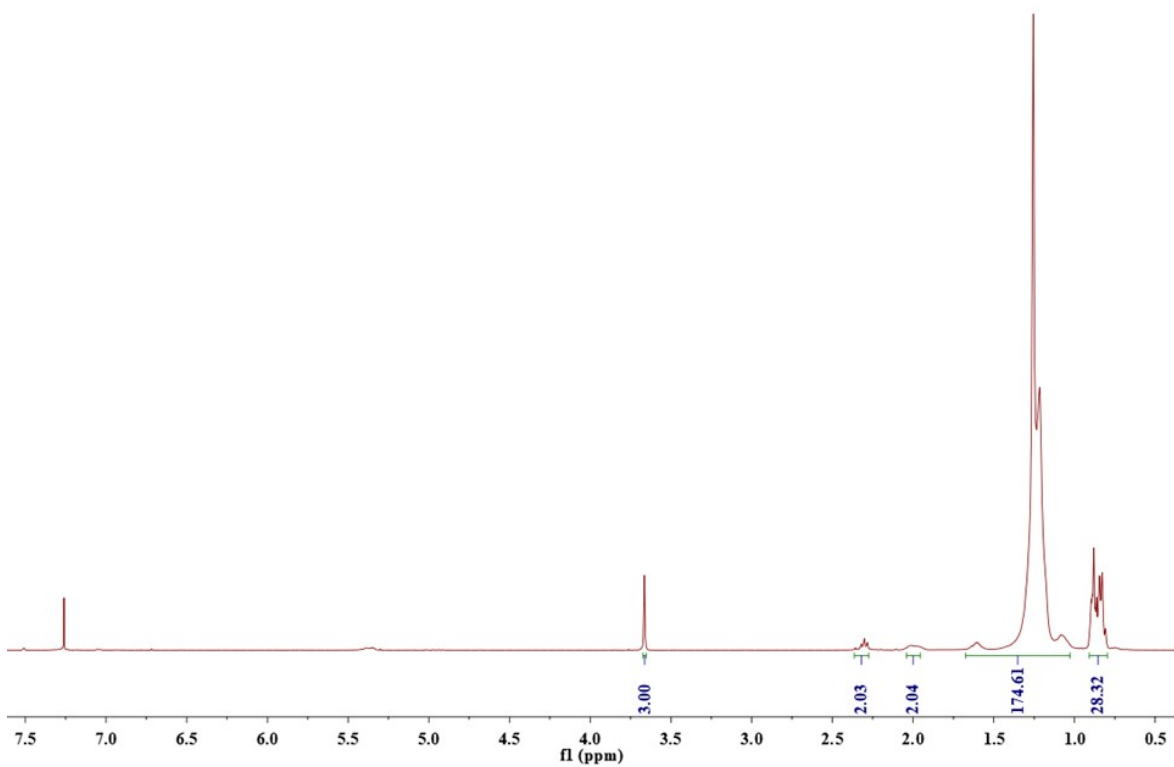

**Figure S36.** <sup>1</sup>H NMR spectrum of the polymer from Table 2, Entry 6 (CDCl<sub>3</sub>).



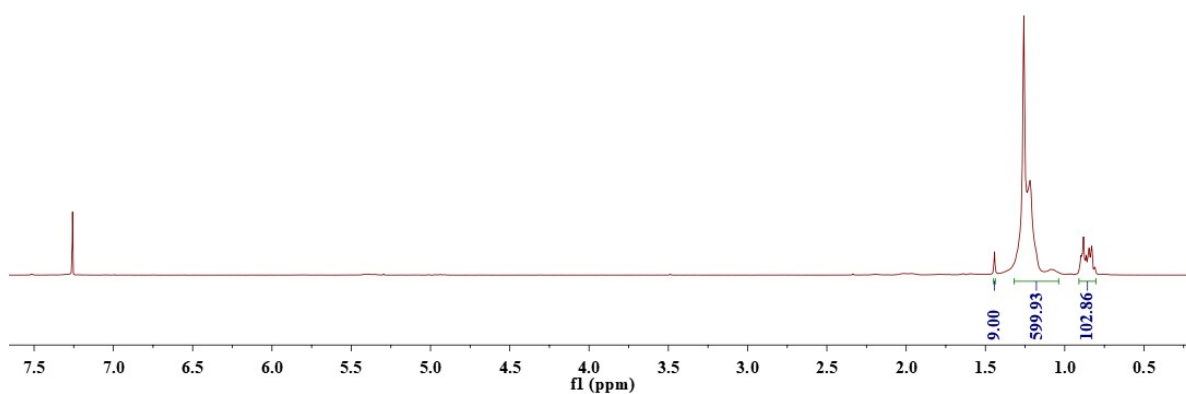

**Figure S37.**  $^1\text{H}$  NMR spectrum of the polymer from Table 2, Entry 7 ( $\text{CDCl}_3$ ).

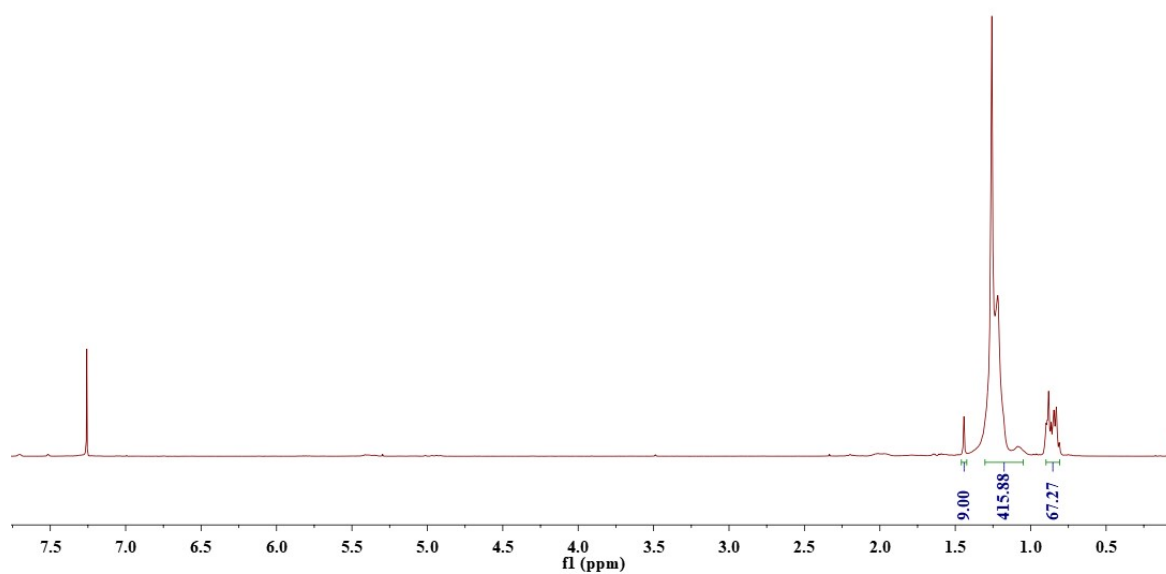

**Figure S38.**  $^1\text{H}$  NMR spectrum of the polymer from Table 2, Entry 8 ( $\text{CDCl}_3$ ).

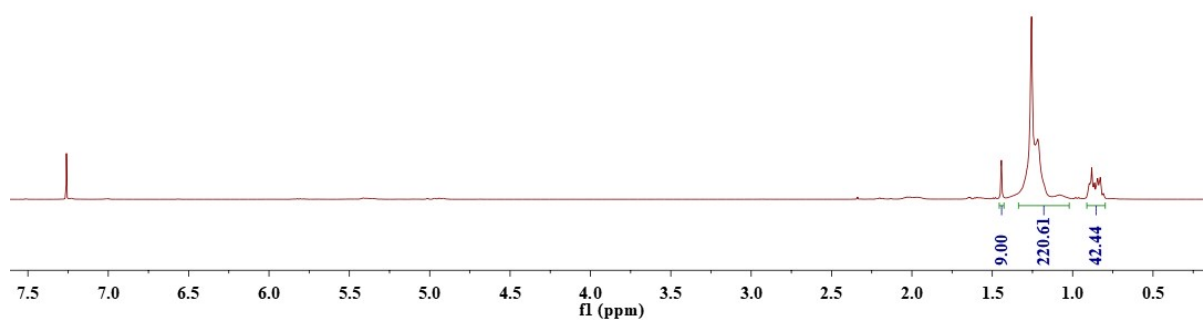

**Figure S39.**  $^1\text{H}$  NMR spectrum of the polymer from Table 2, Entry 9 ( $\text{CDCl}_3$ ).

## 5. GPC traces of polymers

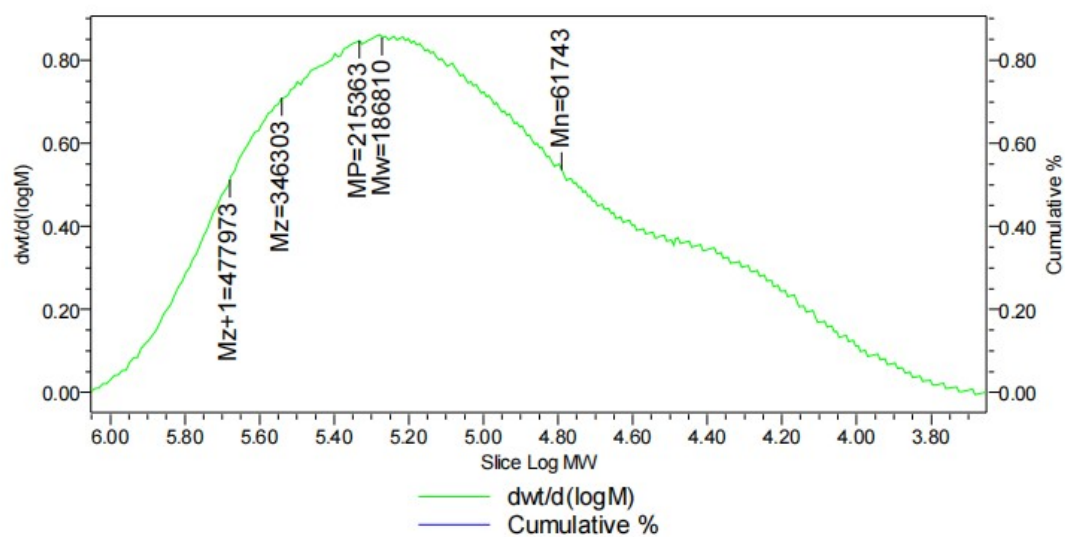

GPC Results

| Dist Name | Mn    | Mw     | MP     | Mz     | Mz+1   | Mv | FDI      | MW 1 | MW 2 |
|-----------|-------|--------|--------|--------|--------|----|----------|------|------|
| 1         | 61743 | 186810 | 215363 | 346303 | 477973 |    | 3.025611 |      |      |

**Figure S40.** GPC trace of the polymer from Table 1, Entry 2.

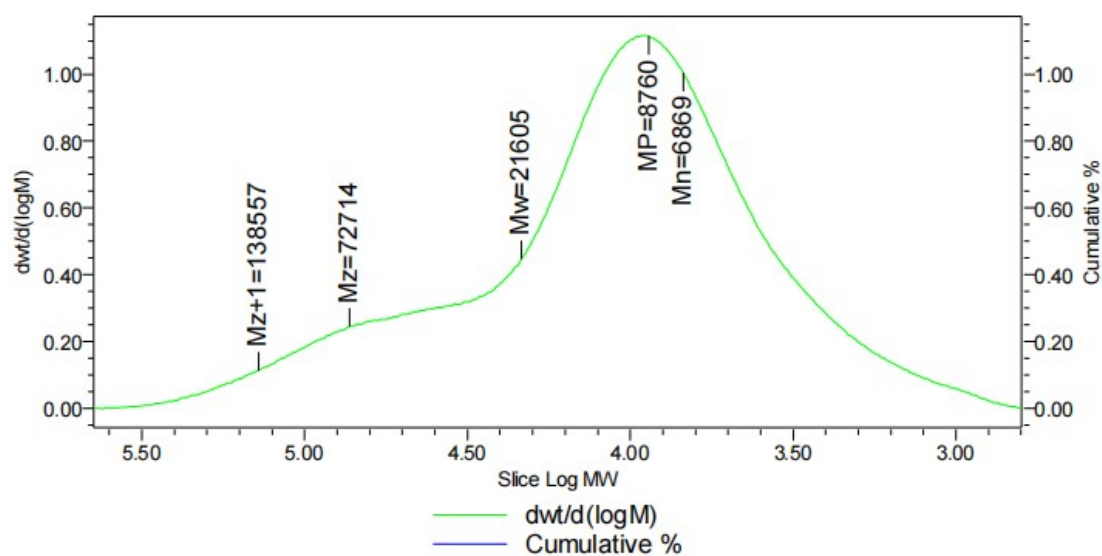

GPC Results

| Dist Name | Mn   | Mw    | MP   | Mz    | Mz+1   | Mv | FDI      | MW 1 | MW 2 |
|-----------|------|-------|------|-------|--------|----|----------|------|------|
| 1         | 6869 | 21605 | 8760 | 72714 | 138557 |    | 3.145370 |      |      |

**Figure S41.** GPC trace of the polymer from Table 1, Entry 3.

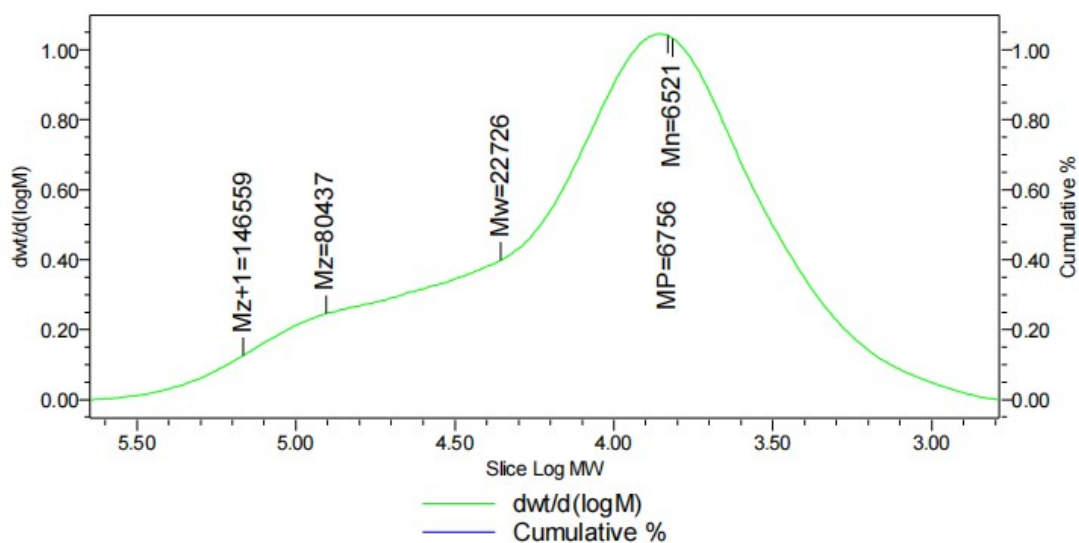

GPC Results

| Dist Name | Mn   | Mw    | MP   | Mz    | Mz+1   | Mv | FDI      | MW 1 | MW 2 |
|-----------|------|-------|------|-------|--------|----|----------|------|------|
| 1         | 6521 | 22726 | 6756 | 80437 | 146559 |    | 3.485115 |      |      |

**Figure S42.** GPC trace of the polymer from Table 1, Entry 4.

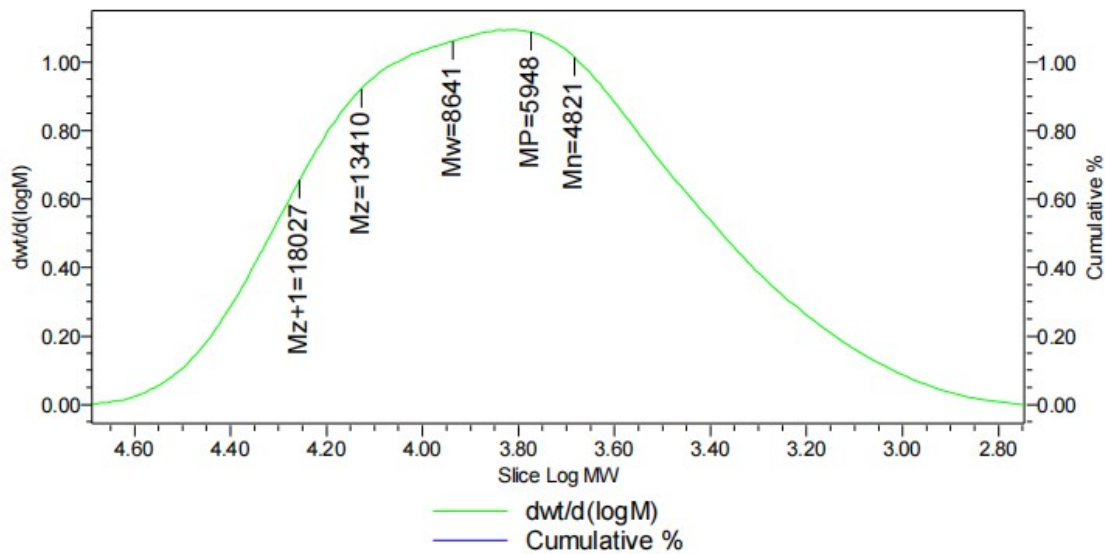

GPC Results

| Dist Name | Mh | Mw   | MP   | Mz   | Mz+1  | Mv    | PDI | MW 1     | MW 2 |  |
|-----------|----|------|------|------|-------|-------|-----|----------|------|--|
| 1         |    | 4821 | 8641 | 5948 | 13410 | 18027 |     | 1.792331 |      |  |

**Figure S43.** GPC trace of the polymer from Table 1, Entry 5.

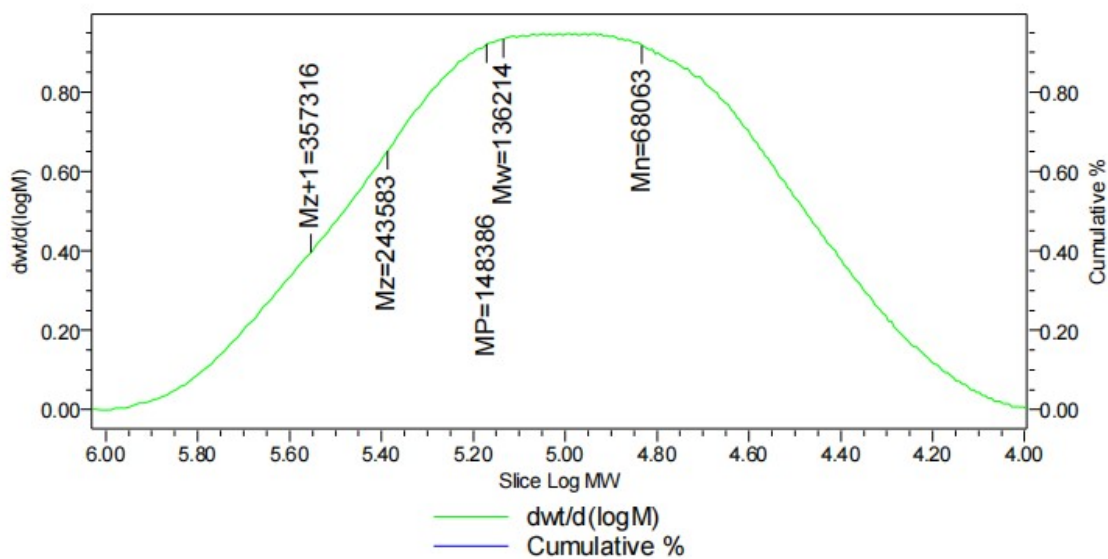

GPC Results

| Dist Name | Mh | Mw    | MP     | Mz     | Mz+1   | Mv     | PDI | MW 1     | MW 2 |  |
|-----------|----|-------|--------|--------|--------|--------|-----|----------|------|--|
| 1         |    | 68063 | 136214 | 148386 | 243583 | 357316 |     | 2.001294 |      |  |

**Figure S44.** GPC trace of the polymer from Table 1, Entry 6.

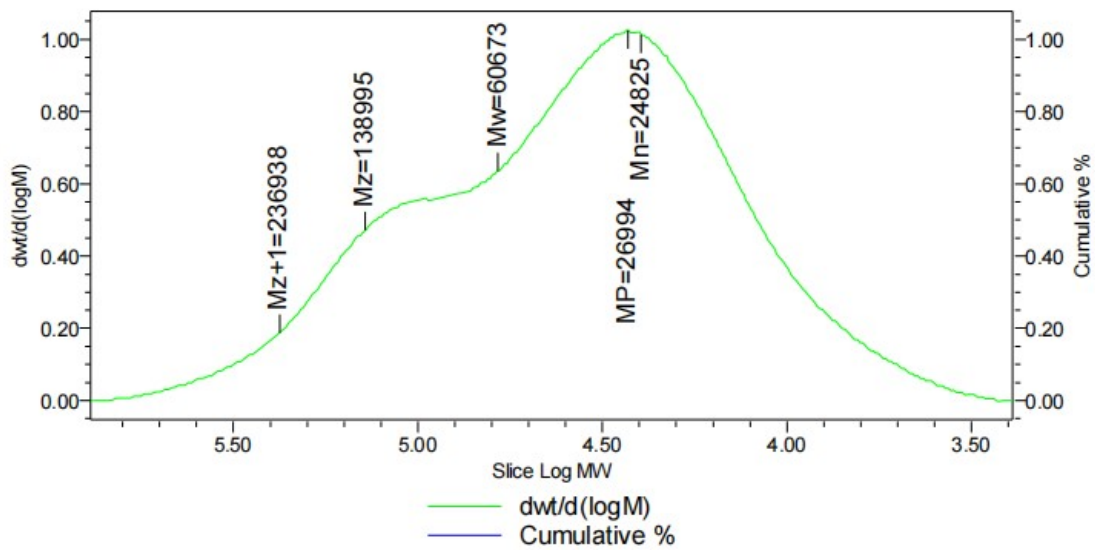

GPC Results

| Dist Name | Mn    | Mw    | MP    | Mz     | Mz+1   | Mv | PDI      | MV 1 | MV 2 |
|-----------|-------|-------|-------|--------|--------|----|----------|------|------|
| 1         | 24825 | 60673 | 26994 | 138995 | 236938 |    | 2.443977 |      |      |

**Figure S45.** GPC trace of the polymer from Table 1, Entry 7.

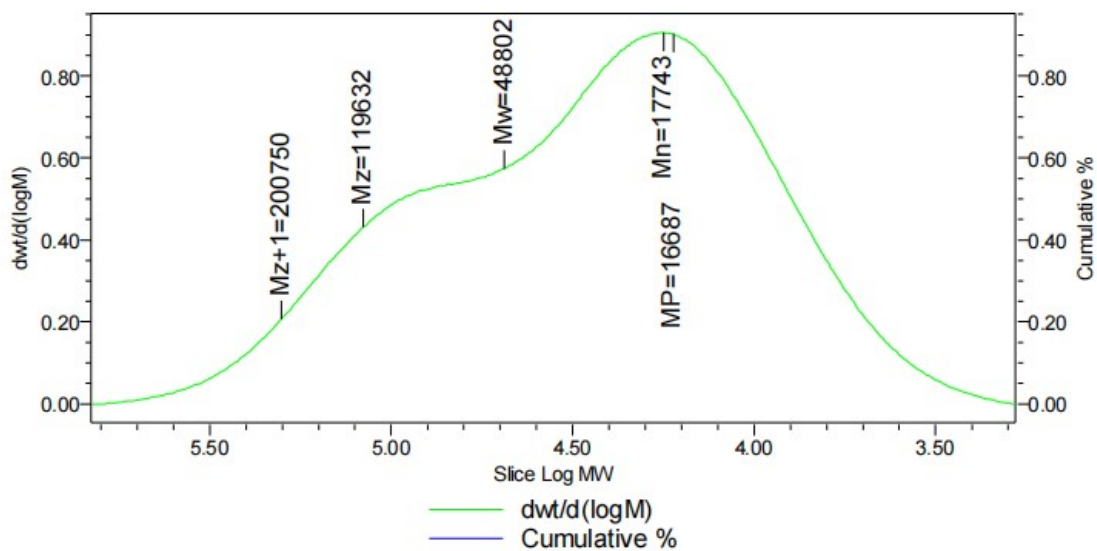

GPC Results

| Dist Name | Mn    | Mw    | MP    | Mz     | Mz+1   | Mv | PDI      | MV 1 | MV 2 |
|-----------|-------|-------|-------|--------|--------|----|----------|------|------|
| 1         | 17743 | 48802 | 16687 | 119632 | 200750 |    | 2.750419 |      |      |

**Figure S46.** GPC trace of the polymer from Table 1, Entry 8.

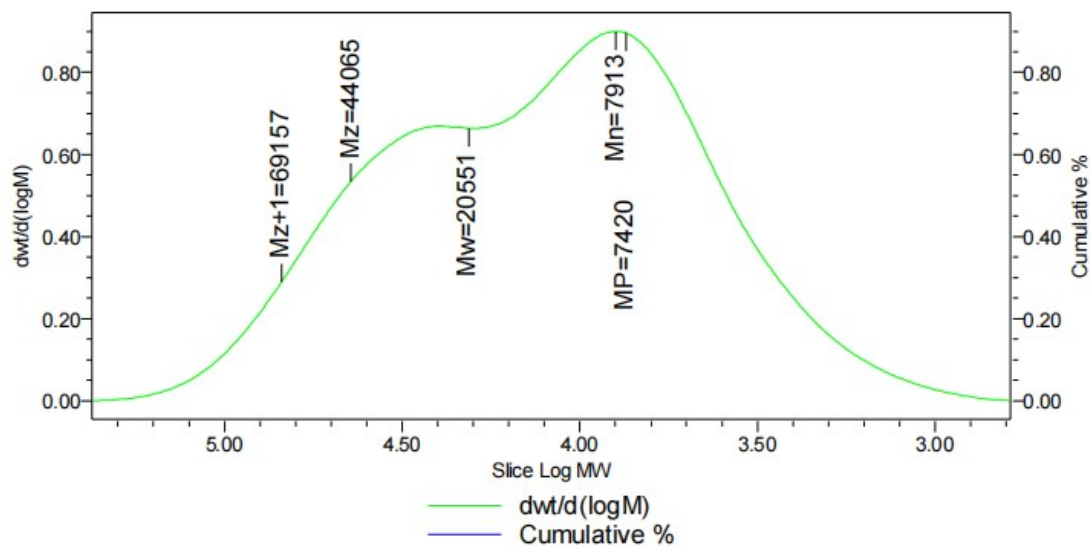

GPC Results

| Dist Name | Mn   | Mw    | MP   | Mz    | Mz+1  | Mv | PDI      | MV 1 | MV 2 |
|-----------|------|-------|------|-------|-------|----|----------|------|------|
| 1         | 7913 | 20551 | 7420 | 44065 | 69157 |    | 2.597078 |      |      |

**Figure S47.** GPC trace of the polymer from Table 1, Entry 9.

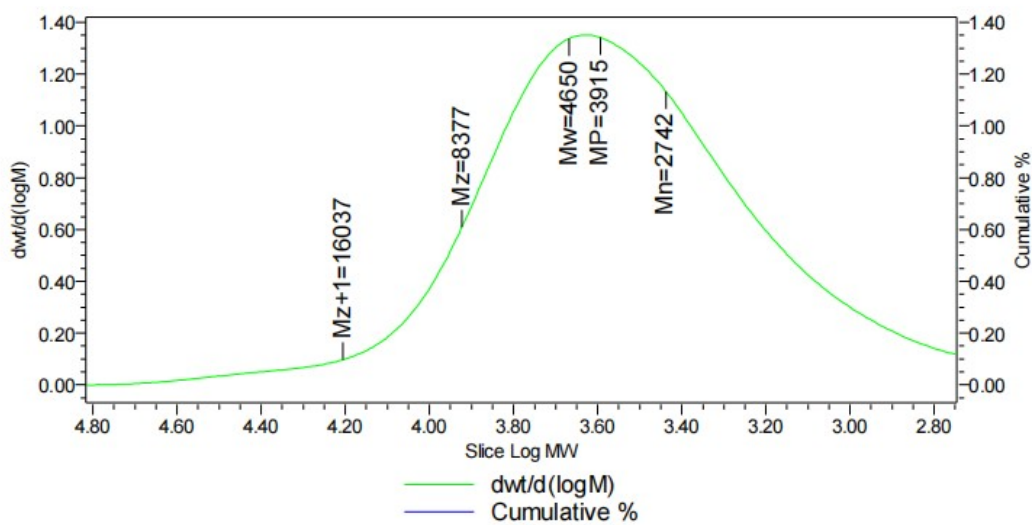

GPC Results

| Dist Name | Mn   | Mw   | MP   | Mz   | Mz+1  | Mv | PDI      | MV 1 | MV 2 |
|-----------|------|------|------|------|-------|----|----------|------|------|
| 1         | 2742 | 4650 | 3915 | 8377 | 16037 |    | 1.695968 |      |      |

**Figure S48.** GPC trace of the polymer from Table 2, Entry 1.

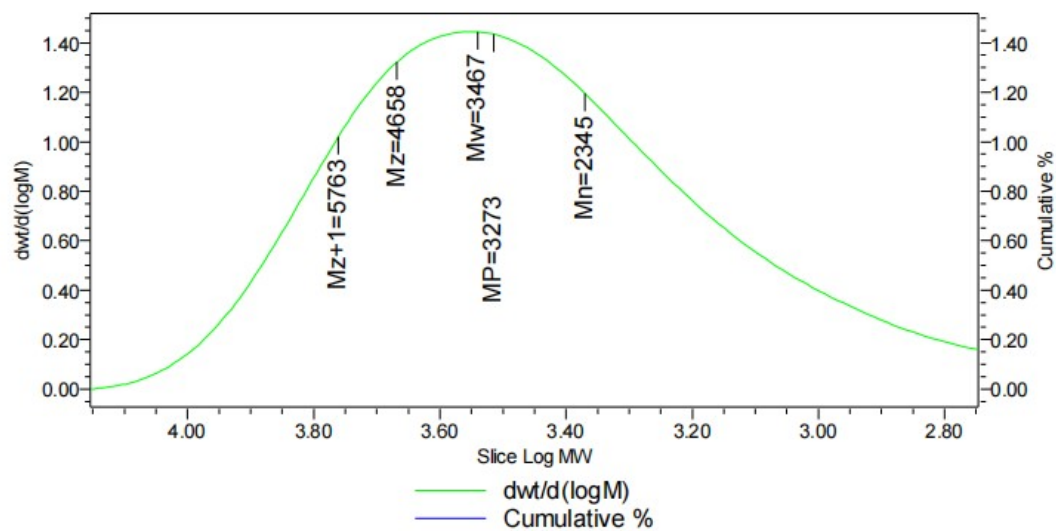

GPC Results

| Dist Name | Mn   | Mw   | MP   | Mz   | Mz+1 | Mv | PDI      | MW 1 | MW 2 |
|-----------|------|------|------|------|------|----|----------|------|------|
| 1         | 2345 | 3467 | 3273 | 4658 | 5763 |    | 1.478375 |      |      |

**Figure S49.** GPC trace of the polymer from Table 2, Entry 2.

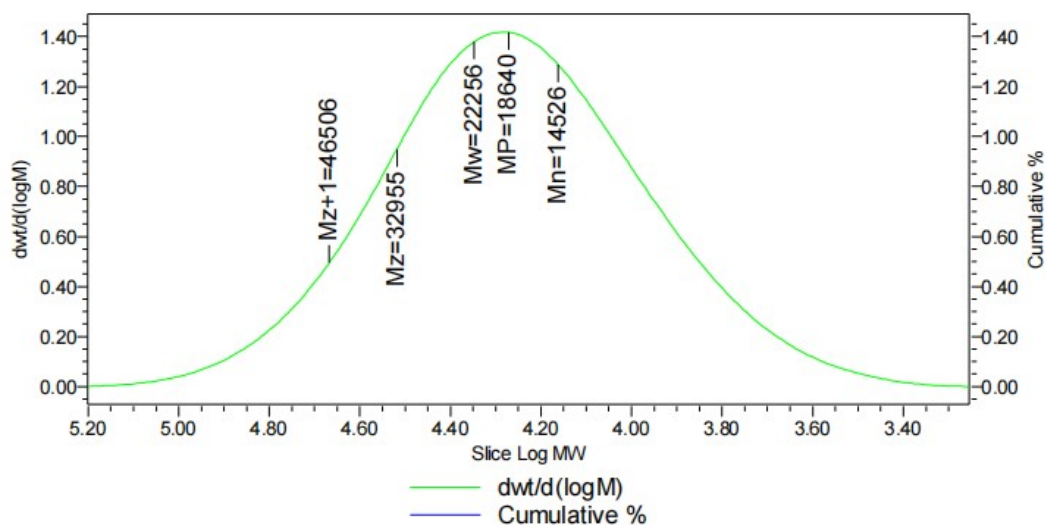

GPC Results

| Dist Name | Mn    | Mw    | MP    | Mz    | Mz+1  | Mv | PDI      | MW 1 | MW 2 |
|-----------|-------|-------|-------|-------|-------|----|----------|------|------|
| 1         | 14526 | 22256 | 18640 | 32955 | 46506 |    | 1.532135 |      |      |

**Figure S50.** GPC trace of the polymer from Table 2, Entry 4.

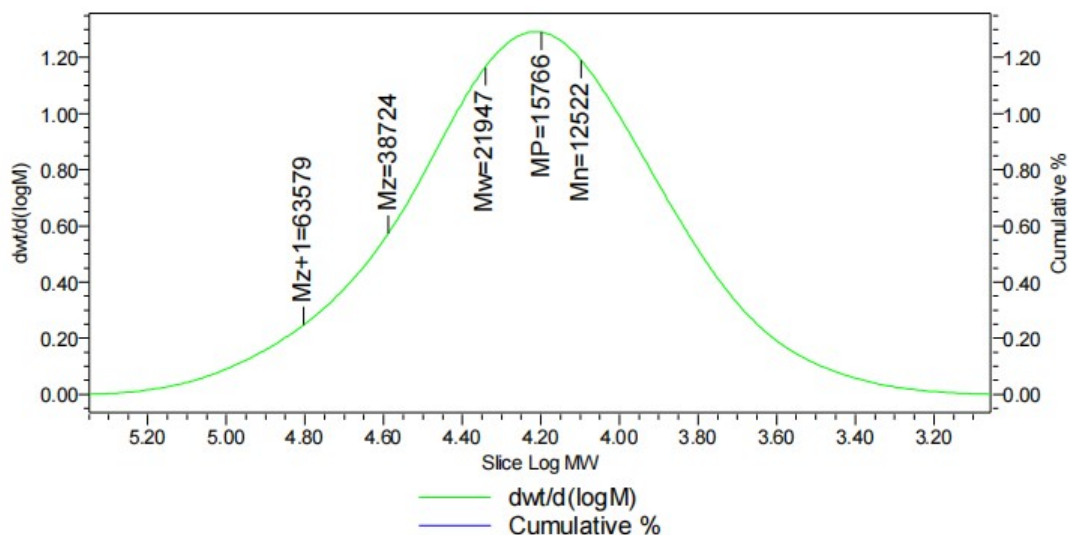

GPC Results

| Dist Name | Mn    | Mw    | MP    | Mz    | Mz+1  | Mv | PDI      | MW 1 | MW 2 |
|-----------|-------|-------|-------|-------|-------|----|----------|------|------|
| 1         | 12522 | 21947 | 15766 | 38724 | 63579 |    | 1.752630 |      |      |

**Figure S51.** GPC trace of the polymer from Table 2, Entry 5.

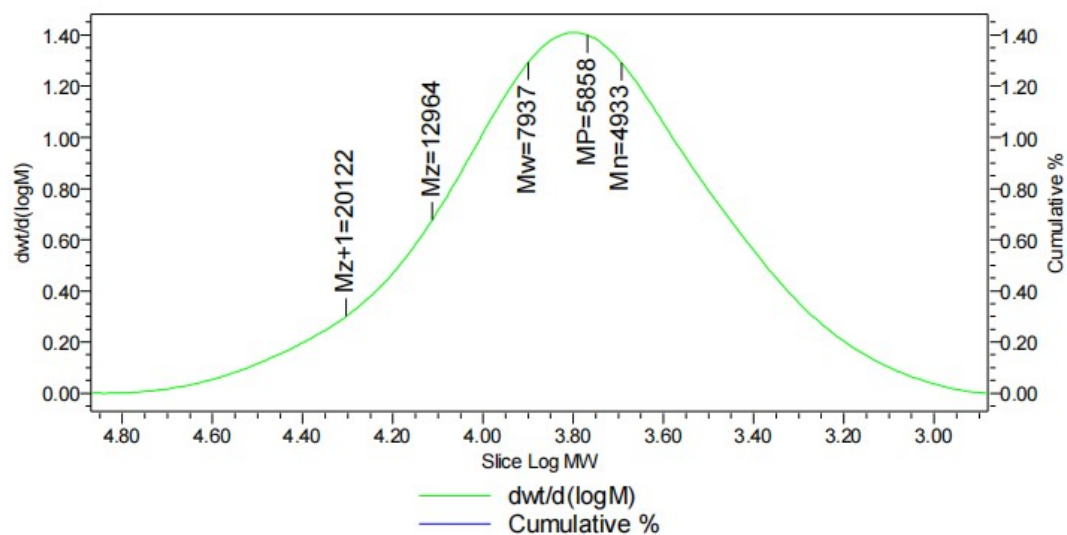

GPC Results

| Dist Name | Mn   | Mw   | MP   | Mz    | Mz+1  | Mv | PDI      | MW 1 | MW 2 |
|-----------|------|------|------|-------|-------|----|----------|------|------|
| 1         | 4933 | 7937 | 5858 | 12964 | 20122 |    | 1.608904 |      |      |

**Figure S52.** GPC trace of the polymer from Table 2, Entry 6.



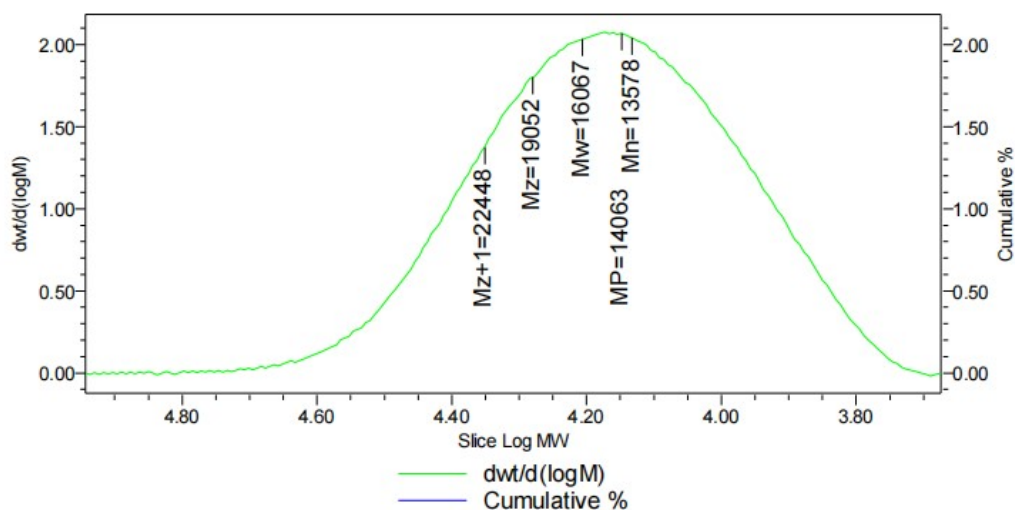

GPC Results

|   | Dist Name | Mn    | Mw    | MP    | Mz    | Mz+1  | Mv | FDI      | MW 1 | MW 2 |
|---|-----------|-------|-------|-------|-------|-------|----|----------|------|------|
| 1 |           | 13578 | 16067 | 14063 | 19052 | 22448 |    | 1.183293 |      |      |

**Figure S53.** GPC trace of the polymer from Table 2, Entry 7.

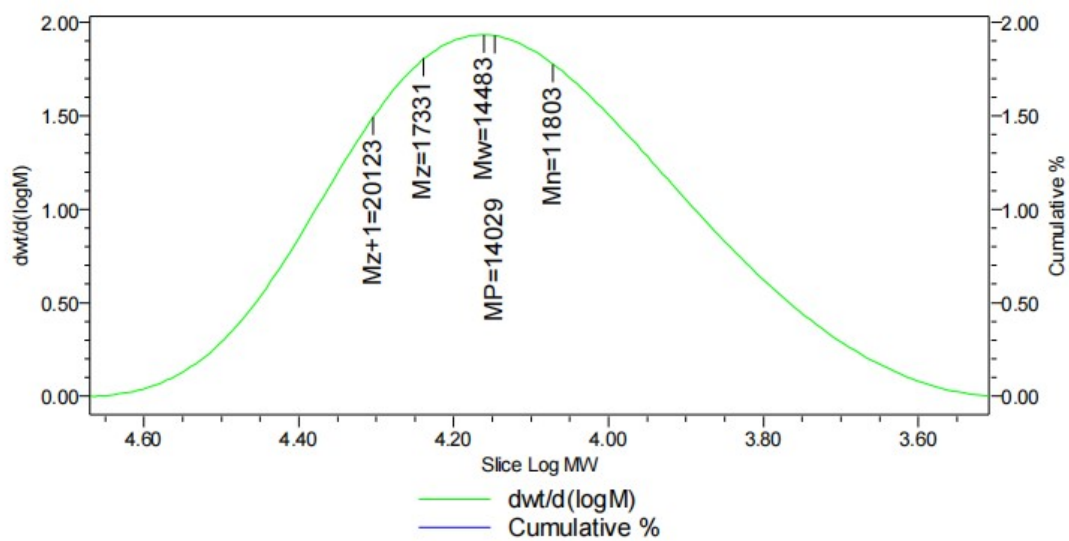

GPC Results

|   | Dist Name | Mn    | Mw    | MP    | Mz    | Mz+1  | Mv | FDI      | MW 1 | MW 2 |
|---|-----------|-------|-------|-------|-------|-------|----|----------|------|------|
| 1 |           | 11803 | 14483 | 14029 | 17331 | 20123 |    | 1.227061 |      |      |

**Figure S54.** GPC trace of the polymer from Table 2, Entry 8.

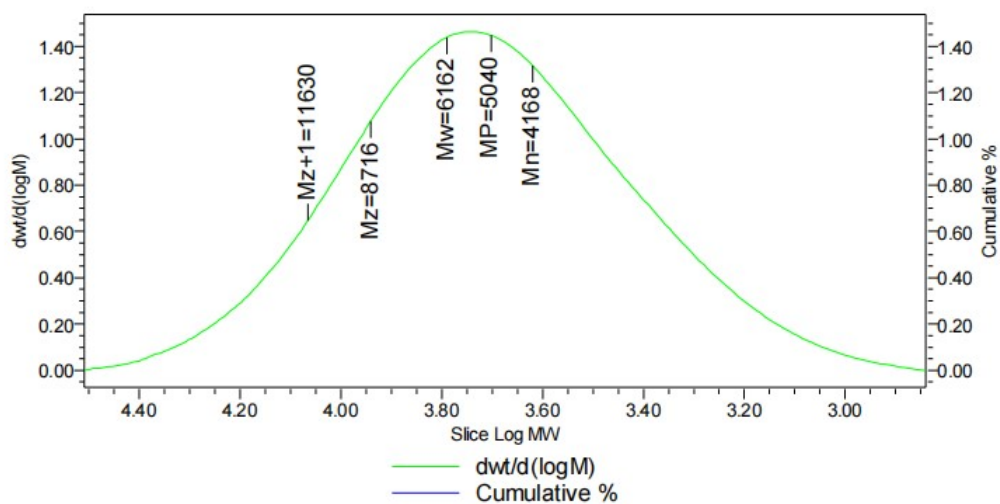

GPC Results

| Dist Name | Mh   | Mw   | MP   | Mz   | Mz+1  | Mv | PDI      | MW 1 | MW 2 |
|-----------|------|------|------|------|-------|----|----------|------|------|
| 1         | 4168 | 6162 | 5040 | 8716 | 11630 |    | 1.478413 |      |      |

**Figure S55.** GPC trace of the polymer from Table 2, Entry 9.

## 6. X-ray crystallography

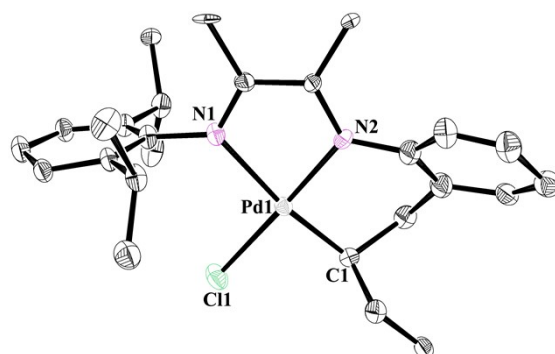

**Table S1. Crystal data and structure refinement for Pd1.**

|                                        |                                                                   |
|----------------------------------------|-------------------------------------------------------------------|
| Identification code                    | <b>Pd1</b>                                                        |
| Empirical formula                      | C <sub>26</sub> H <sub>35</sub> Cl <sub>1</sub> N <sub>2</sub> Pd |
| Formula weight                         | 517.41                                                            |
| Temperature/K                          | 170.0                                                             |
| Crystal system                         | monoclinic                                                        |
| Space group                            | P21                                                               |
| a/Å                                    | 15.119(3)                                                         |
| b/Å                                    | 15.120(3)                                                         |
| c/Å                                    | 24.857(5)                                                         |
| $\alpha$ /°                            | 90                                                                |
| $\beta$ /°                             | 103.91(3)                                                         |
| $\gamma$ /°                            | 90                                                                |
| Volume/Å <sup>3</sup>                  | 5516(2)                                                           |
| Z                                      | 8                                                                 |
| $\rho_{\text{calc}}$ /cm <sup>3</sup>  | 1.246                                                             |
| $\mu$ /mm <sup>-1</sup>                | 0.783                                                             |
| F(000)                                 | 2144                                                              |
| Crystal size/mm <sup>3</sup>           | 0.5 × 0.4 × 0.3                                                   |
| Radiation                              | MoKa ( $\lambda$ = 0.71073)                                       |
| 2 $\theta$ range for data collection/° | 4.23 to 52.76                                                     |
| Index ranges                           | -23 ≤ h ≤ 23, -13 ≤ k ≤ 12, -25 ≤ l ≤ 24                          |
| Reflections collected                  | 29396                                                             |
| Independent reflections                | 9542 [ $R_{\text{int}}$ = 0.1292, $R_{\text{sigma}}$ = 0.0983]    |
| Data/restraints/parameters             | 9542/704/1109                                                     |
| Goodness-of-fit on F <sup>2</sup>      | 1.300                                                             |
| Final R indexes [ $I > 2\sigma(I)$ ]   | R1 = 0.1223, wR2 = 0.3000                                         |
| Final R indexes [all data]             | R1 = 0.1360, wR2 = 0.3147                                         |

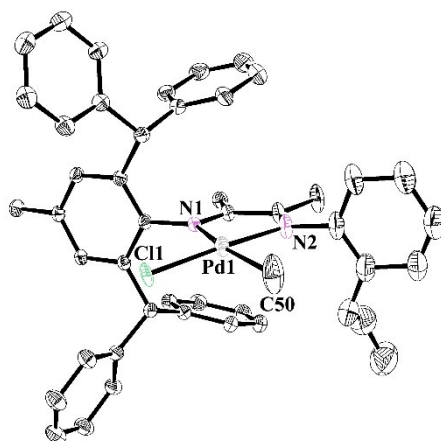

**Table S2. Crystal data and structure refinement for Pd2.**

|                                    |                                                               |
|------------------------------------|---------------------------------------------------------------|
| Identification code                | <b>Pd2</b>                                                    |
| Empirical formula                  | C <sub>47</sub> H <sub>44</sub> ClN <sub>2</sub> Pd           |
| Formula weight                     | 778.69                                                        |
| Temperature/K                      | 170                                                           |
| Crystal system                     | monoclinic                                                    |
| Space group                        | P2 <sub>1</sub> /c                                            |
| a/Å                                | 19.1884(5)                                                    |
| b/Å                                | 10.6212(3)                                                    |
| c/Å                                | 20.1144(5)                                                    |
| α/°                                | 90                                                            |
| β/°                                | 107.6140(10)                                                  |
| γ/°                                | 90                                                            |
| Volume/Å <sup>3</sup>              | 3907.20(18)                                                   |
| Z                                  | 4                                                             |
| ρ <sub>calc</sub> /cm <sup>3</sup> | 1.324                                                         |
| μ/mm <sup>-1</sup>                 | 0.578                                                         |
| F(000)                             | 1612.0                                                        |
| Crystal size/mm <sup>3</sup>       | 0.11 × 0.06 × 0.04                                            |
| Radiation                          | MoKα (λ = 0.71073)                                            |
| 2θ range for data collection/°     | 4.25 to 52.826                                                |
| Index ranges                       | -23 ≤ h ≤ 23, -13 ≤ k ≤ 12, -25 ≤ l ≤ 24                      |
| Reflections collected              | 37208                                                         |
| Independent reflections            | 7963 [R <sub>int</sub> = 0.0602, R <sub>sigma</sub> = 0.0478] |
| Data/restraints/parameters         | 7963/485/488                                                  |
| Goodness-of-fit on F <sup>2</sup>  | 1.062                                                         |
| Final R indexes [I ≥ 2σ (I)]       | R1 = 0.0596, wR2 = 0.1702                                     |
| Final R indexes [all data]         | R1 = 0.0662, wR2 = 0.1758                                     |

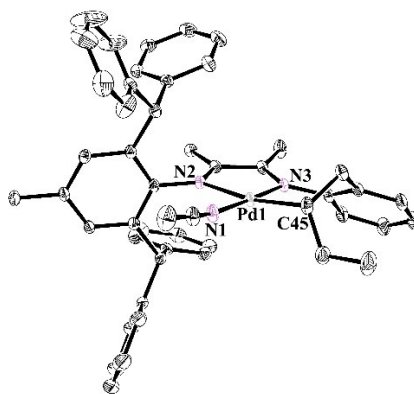

**Table S3. Crystal data and structure refinement for Pd2-ACN.**

|                                               |                                                                |
|-----------------------------------------------|----------------------------------------------------------------|
| Identification code                           | <b>Pd2-ACN</b>                                                 |
| Empirical formula                             | $C_{81}H_{60}BF_{24}N_3Pd$                                     |
| Formula weight                                | 1648.53                                                        |
| Temperature/K                                 | 150                                                            |
| Crystal system                                | triclinic                                                      |
| Space group                                   | P-1                                                            |
| $a/\text{\AA}$                                | 10.0340(3)                                                     |
| $b/\text{\AA}$                                | 19.1514(7)                                                     |
| $c/\text{\AA}$                                | 20.3631(6)                                                     |
| $\alpha/^\circ$                               | 100.5850(10)                                                   |
| $\beta/^\circ$                                | 95.0430(10)                                                    |
| $\gamma/^\circ$                               | 104.5800(10)                                                   |
| Volume/ $\text{\AA}^3$                        | 3685.4(2)                                                      |
| Z                                             | 2                                                              |
| $\rho_{\text{calc}}/\text{g/cm}^3$            | 1.486                                                          |
| $\mu/\text{mm}^{-1}$                          | 0.360                                                          |
| F(000)                                        | 1668.0                                                         |
| Crystal size/ $\text{mm}^3$                   | $0.15 \times 0.06 \times 0.03$                                 |
| Radiation                                     | MoK $\alpha$ ( $\lambda = 0.71073$ )                           |
| $2\theta$ range for data collection/ $^\circ$ | 4.236 to 52.762                                                |
| Index ranges                                  | $-12 \leq h \leq 12, -23 \leq k \leq 23, -24 \leq l \leq 25$   |
| Reflections collected                         | 43578                                                          |
| Independent reflections                       | 14994 [ $R_{\text{int}} = 0.0508, R_{\text{sigma}} = 0.0592$ ] |
| Data/restraints/parameters                    | 14994/1116/1023                                                |
| Goodness-of-fit on $F^2$                      | 1.050                                                          |
| Final R indexes [ $I > 2\sigma(I)$ ]          | $R1 = 0.0553, wR2 = 0.1375$                                    |
| Final R indexes [all data]                    | $R1 = 0.0679, wR2 = 0.1478$                                    |
